# Supplementary material for: Spatiotemporal recruitment of the ubiquitin-specific protease USP8 directs endosome maturation
Source: eLife journal article supplement (doi:10.7554/elife.96353), 2024-04-16
Supplement: fig1-data1 [file elife-96353-fig1-data1-v1.zip]

## Sheet: volume of LAAT-1
wt	usp-50(gk632973)	usp-50(xd413)
0.0432	0.0432	0.0048
0.0432	0.0432	0.0048
0.0432	0.0432	0.0048
0.0432	0.048	0.0048
0.0432	0.048	0.0048
0.0432	0.0528	0.0048
0.0432	0.0528	0.0048
0.048	0.0528	0.0048
0.048	0.0528	0.0048
0.048	0.0528	0.0048
0.048	0.0528	0.0048
0.048	0.0576	0.0048
0.048	0.0576	0.0048
0.048	0.0576	0.0048
0.048	0.0576	0.0048
0.048	0.0576	0.0048
0.048	0.0624	0.0048
0.0528	0.0624	0.0048
0.0528	0.0624	0.0048
0.0528	0.0672	0.0048
0.0528	0.0672	0.0048
0.0528	0.072	0.0048
0.0528	0.072	0.0048
0.0528	0.072	0.0048
0.0528	0.0768	0.0048
0.0528	0.0768	0.0048
0.0528	0.0816	0.0048
0.0576	0.0816	0.0048
0.0576	0.0816	0.0048
0.0576	0.0816	0.0048
0.0576	0.0864	0.0048
0.0576	0.0864	0.0048
0.0576	0.0912	0.0048
0.0576	0.096	0.0048
0.0576	0.096	0.0048
0.0576	0.096	0.0048
0.0576	0.096	0.0048
0.0624	0.101	0.0048
0.0624	0.101	0.0048
0.0624	0.101	0.0048
0.0624	0.106	0.0048
0.0624	0.106	0.0048
0.0624	0.106	0.0048
0.0624	0.11	0.0048
0.0624	0.11	0.0048
0.0624	0.11	0.0048
0.0672	0.115	0.0048
0.0672	0.12	0.0048
0.0672	0.12	0.0048
0.0672	0.12	0.0048
0.0672	0.12	0.0048
0.0672	0.125	0.0096
0.0672	0.125	0.0096
0.0672	0.125	0.0096
0.0672	0.13	0.0096
0.072	0.13	0.0096
0.072	0.134	0.0096
0.072	0.144	0.0096
0.072	0.144	0.0096
0.072	0.144	0.0096
0.072	0.144	0.0096
0.0768	0.144	0.0096
0.0768	0.144	0.0096
0.0768	0.144	0.0096
0.0768	0.149	0.0096
0.0768	0.149	0.0096
0.0768	0.149	0.0096
0.0768	0.149	0.0096
0.0768	0.149	0.0144
0.0768	0.154	0.0144
0.0768	0.154	0.0144
0.0816	0.154	0.0144
0.0816	0.154	0.0144
0.0816	0.158	0.0144
0.0816	0.158	0.0144
0.0816	0.158	0.0144
0.0816	0.163	0.0144
0.0816	0.168	0.0192
0.0816	0.168	0.0192
0.0816	0.168	0.0192
0.0816	0.168	0.0192
0.0816	0.173	0.0192
0.0864	0.173	0.0192
0.0864	0.178	0.0192
0.0864	0.178	0.0192
0.0864	0.182	0.0192
0.0864	0.182	0.024
0.0864	0.182	0.024
0.0864	0.187	0.024
0.0912	0.187	0.0288
0.0912	0.192	0.0288
0.0912	0.192	0.0288
0.0912	0.192	0.0288
0.0912	0.197	0.0288
0.0912	0.197	0.0288
0.0912	0.197	0.0336
0.0912	0.202	0.0336
0.0912	0.202	0.0336
0.0912	0.206	0.0336
0.096	0.206	0.0336
0.096	0.206	0.0384
0.096	0.206	0.0384
0.096	0.211	0.0384
0.096	0.221	0.0384
0.096	0.221	0.0384
0.096	0.23	0.0384
0.096	0.24	0.0384
0.096	0.254	0.0432
0.101	0.254	0.0432
0.101	0.254	0.0432
0.101	0.254	0.0432
0.101	0.259	0.0432
0.101	0.259	0.0432
0.101	0.259	0.0432
0.101	0.264	0.0432
0.106	0.264	0.0432
0.106	0.274	0.0432
0.106	0.274	0.0432
0.106	0.278	0.0432
0.106	0.283	0.0432
0.106	0.288	0.0432
0.106	0.293	0.0432
0.106	0.298	0.0432
0.106	0.302	0.0432
0.106	0.307	0.0432
0.106	0.307	0.0432
0.11	0.307	0.0432
0.11	0.312	0.0432
0.11	0.312	0.0432
0.11	0.326	0.0432
0.11	0.326	0.0432
0.11	0.341	0.0432
0.11	0.355	0.0432
0.115	0.36	0.048
0.115	0.36	0.048
0.115	0.389	0.048
0.115	0.389	0.048
0.115	0.408	0.048
0.115	0.408	0.048
0.115	0.413	0.048
0.115	0.427	0.048
0.12	0.427	0.048
0.12	0.432	0.048
0.12	0.432	0.048
0.12	0.442	0.048
0.12	0.451	0.048
0.125	0.461	0.048
0.125	0.461	0.048
0.125	0.461	0.048
0.125	0.475	0.048
0.125	0.49	0.048
0.13	0.49	0.048
0.13	0.49	0.048
0.13	0.494	0.048
0.13	0.528	0.048
0.13	0.533	0.048
0.134	0.538	0.048
0.134	0.552	0.048
0.134	0.562	0.048
0.134	0.6	0.048
0.134	0.61	0.048
0.134	0.614	0.0528
0.134	0.629	0.0528
0.134	0.638	0.0528
0.139	0.643	0.0528
0.139	0.648	0.0528
0.139	0.658	0.0528
0.144	0.691	0.0528
0.144	0.715	0.0528
0.144	0.725	0.0528
0.144	0.725	0.0528
0.149	0.734	0.0528
0.149	0.749	0.0528
0.149	0.754	0.0528
0.149	0.768	0.0528
0.149	0.782	0.0528
0.154	0.787	0.0528
0.154	0.806	0.0576
0.154	0.821	0.0576
0.154	0.835	0.0576
0.158	0.888	0.0576
0.158	0.902	0.0576
0.158	0.902	0.0576
0.158	0.941	0.0576
0.163	0.96	0.0576
0.163	0.994	0.0576
0.163	1.01	0.0576
0.163	1.02	0.0576
0.163	1.03	0.0576
0.168	1.05	0.0624
0.168	1.05	0.0624
0.168	1.07	0.0624
0.173	1.11	0.0624
0.173	1.13	0.0624
0.178	1.13	0.0624
0.178	1.16	0.0624
0.178	1.18	0.0624
0.178	1.2	0.0624
0.178	1.24	0.0624
0.178	1.25	0.0624
0.178	1.3	0.0624
0.182	1.3	0.0624
0.182	1.31	0.0624
0.182	1.33	0.0624
0.182	1.37	0.0624
0.182	1.49	0.0624
0.182	1.5	0.0624
0.187	1.51	0.0624
0.187	1.51	0.0624
0.187	1.57	0.0624
0.187	1.63	0.0624
0.192	1.68	0.0624
0.192	1.8	0.0672
0.192	1.83	0.0672
0.192	1.85	0.0672
0.197	2.11	0.0672
0.197	2.24	0.0672
0.197	2.26	0.0672
0.197	2.37	0.0672
0.202	2.39	0.0672
0.202	2.59	0.0672
0.202	2.61	0.0672
0.202	2.99	0.0672
0.206	4.56	0.0672
0.206	5.64	0.0672
0.206	6.05	0.0672
0.206		0.0672
0.211		0.0672
0.211		0.0672
0.211		0.0672
0.211		0.0672
0.211		0.0672
0.216		0.0672
0.216		0.0672
0.221		0.0672
0.221		0.072
0.221		0.072
0.221		0.072
0.226		0.072
0.226		0.072
0.23		0.072
0.23		0.072
0.23		0.072
0.235		0.072
0.235		0.072
0.235		0.072
0.235		0.0768
0.235		0.0768
0.235		0.0768
0.235		0.0768
0.24		0.0768
0.24		0.0768
0.24		0.0768
0.24		0.0768
0.24		0.0768
0.245		0.0768
0.245		0.0768
0.245		0.0768
0.245		0.0816
0.245		0.0816
0.25		0.0816
0.25		0.0816
0.254		0.0816
0.254		0.0816
0.254		0.0816
0.259		0.0816
0.259		0.0816
0.264		0.0864
0.264		0.0864
0.264		0.0864
0.269		0.0864
0.269		0.0864
0.269		0.0864
0.274		0.0864
0.274		0.0864
0.274		0.0864
0.278		0.0864
0.278		0.0912
0.278		0.0912
0.278		0.0912
0.278		0.0912
0.278		0.0912
0.278		0.0912
0.283		0.0912
0.283		0.0912
0.283		0.0912
0.283		0.0912
0.283		0.0912
0.288		0.096
0.288		0.096
0.288		0.096
0.288		0.096
0.288		0.096
0.293		0.096
0.293		0.096
0.293		0.096
0.293		0.096
0.293		0.096
0.293		0.096
0.293		0.096
0.293		0.096
0.298		0.096
0.298		0.096
0.298		0.096
0.302		0.096
0.302		0.096
0.307		0.101
0.307		0.101
0.312		0.101
0.312		0.101
0.312		0.101
0.312		0.101
0.312		0.101
0.317		0.106
0.317		0.106
0.322		0.106
0.322		0.106
0.322		0.106
0.331		0.106
0.331		0.106
0.331		0.106
0.336		0.106
0.336		0.106
0.336		0.11
0.336		0.11
0.336		0.11
0.346		0.11
0.346		0.11
0.346		0.11
0.35		0.11
0.355		0.11
0.355		0.115
0.355		0.115
0.36		0.115
0.36		0.115
0.36		0.115
0.36		0.115
0.36		0.115
0.365		0.115
0.365		0.115
0.365		0.115
0.365		0.115
0.365		0.12
0.37		0.12
0.37		0.12
0.37		0.12
0.374		0.125
0.374		0.125
0.374		0.125
0.374		0.125
0.379		0.125
0.379		0.125
0.379		0.13
0.379		0.13
0.384		0.13
0.384		0.13
0.384		0.13
0.384		0.134
0.389		0.134
0.389		0.134
0.389		0.134
0.389		0.134
0.389		0.139
0.398		0.139
0.398		0.139
0.408		0.139
0.408		0.139
0.408		0.139
0.408		0.139
0.413		0.144
0.413		0.144
0.413		0.144
0.413		0.144
0.418		0.144
0.422		0.144
0.427		0.144
0.427		0.144
0.427		0.144
0.432		0.144
0.432		0.144
0.432		0.149
0.432		0.154
0.442		0.154
0.442		0.154
0.446		0.158
0.451		0.158
0.451		0.158
0.456		0.158
0.461		0.158
0.461		0.163
0.461		0.163
0.466		0.163
0.475		0.168
0.475		0.168
0.475		0.168
0.475		0.168
0.48		0.168
0.48		0.173
0.485		0.173
0.485		0.173
0.485		0.178
0.485		0.178
0.49		0.182
0.49		0.182
0.49		0.182
0.49		0.182
0.49		0.187
0.49		0.187
0.494		0.187
0.494		0.187
0.504		0.187
0.504		0.187
0.509		0.192
0.514		0.192
0.518		0.197
0.518		0.197
0.523		0.197
0.533		0.202
0.533		0.202
0.538		0.202
0.538		0.202
0.542		0.211
0.542		0.211
0.542		0.211
0.547		0.211
0.552		0.211
0.552		0.216
0.562		0.216
0.562		0.216
0.571		0.216
0.571		0.216
0.571		0.216
0.581		0.221
0.586		0.221
0.586		0.221
0.59		0.221
0.59		0.226
0.59		0.226
0.595		0.226
0.6		0.226
0.605		0.23
0.614		0.24
0.619		0.24
0.619		0.245
0.624		0.25
0.629		0.259
0.629		0.264
0.634		0.269
0.638		0.269
0.638		0.274
0.643		0.283
0.653		0.283
0.653		0.288
0.653		0.288
0.658		0.293
0.662		0.293
0.662		0.293
0.672		0.293
0.677		0.298
0.677		0.298
0.677		0.298
0.682		0.298
0.682		0.302
0.691		0.302
0.691		0.302
0.696		0.312
0.701		0.312
0.701		0.312
0.701		0.317
0.71		0.326
0.715		0.326
0.72		0.326
0.72		0.331
0.72		0.336
0.725		0.336
0.734		0.336
0.744		0.336
0.754		0.341
0.758		0.341
0.763		0.341
0.763		0.341
0.782		0.346
0.787		0.346
0.787		0.355
0.797		0.365
0.802		0.365
0.806		0.37
0.811		0.374
0.816		0.384
0.826		0.384
0.83		0.384
0.83		0.384
0.83		0.389
0.835		0.389
0.845		0.394
0.85		0.398
0.859		0.398
0.864		0.403
0.864		0.408
0.864		0.408
0.869		0.408
0.874		0.418
0.878		0.422
0.893		0.422
0.912		0.432
0.912		0.437
0.946		0.437
0.946		0.442
0.946		0.446
0.96		0.446
0.97		0.446
0.974		0.451
0.998		0.466
0.998		0.47
1		0.47
1		0.485
1		0.494
1.01		0.494
1.01		0.504
1.05		0.514
1.05		0.518
1.05		0.518
1.06		0.528
1.07		0.538
1.08		0.552
1.08		0.562
1.09		0.566
1.1		0.595
1.11		0.61
1.11		0.619
1.12		0.624
1.13		0.624
1.13		0.648
1.15		0.658
1.16		0.662
1.16		0.662
1.18		0.686
1.2		0.739
1.2		0.773
1.2		0.773
1.21		0.792
1.23		0.816
1.24		0.816
1.26		0.864
1.27		0.874
1.27		0.874
1.3		0.874
1.3		0.902
1.31		0.912
1.31		0.912
1.32		0.917
1.36		0.941
1.37		0.95
1.37		0.97
1.37		0.974
1.39		0.984
1.39		0.998
1.4		1.08
1.4		1.08
1.42		1.1
1.44		1.13
1.45		1.15
1.45		1.15
1.47		1.16
1.49		1.25
1.51		1.27
1.54		1.3
1.54		1.3
1.56		1.32
1.6		1.33
1.64		1.39
1.66		1.42
1.66		1.46
1.72		1.51
1.74		1.64
1.76		1.67
1.76		1.68
1.77		1.75
1.78		1.95
1.79		2.08
1.8		2.09
1.81		2.23
1.81		2.25
1.83		2.64
1.84		3.06
1.84		3.42
1.86		3.54
1.92		3.85
1.92
1.93
1.97
1.98
2.03
2.03
2.04
2.04
2.05
2.08
2.09
2.13
2.14
2.23
2.28
2.37
2.42
2.45
2.53
2.54
2.56
2.59
2.66
2.66
2.67
2.71
2.74
2.76
2.8
2.85
2.88
2.88
2.97
2.99
3.01
3.02
3.2
3.24
3.24
3.24
3.29
3.36
3.38
3.55
3.6
3.67
3.75
3.78
3.81
3.81
3.9
3.9
4.01
4.04
4.11
4.11
4.14
4.24
4.26
4.31
4.37
4.41
4.49
4.51
4.79
4.8
4.81
4.86
4.9
5.04
5.07
5.08
5.11
5.48
5.49
5.49
5.52
5.59
5.94
5.95
6.04
6.2
6.23
6.24
6.33
6.36
6.37
6.65
6.76
6.83
6.88
6.92
7.2
7.24
7.29
7.32
7.36
7.63
7.77
7.77
7.84
7.85
7.98
8.09
8.09
8.3
8.35
8.6
8.81
9.04
9.25
9.28
9.67
9.67
9.9
10.08
10.39
10.97
11.05
11.19
11.19
11.65
12.03
12.06
12.28
12.34
13.13
14.97
15.36
16.77
18.84
19.3

## Sheet: total volume  of LAAT-1
wt	usp-50(gk632973)	usp-50(xd413)
220.62	16.61	22.13
106.08	9.7	14.15
166.34	6.54	16.62
100.07	6.25	14.75
155.9	3.19	18.48
153.77	17.73	14.22
92.96	8.76	12.34
93.07	26.53	9.6
151.92	25.78	14.34
75.46	6.84	9.83
105.84	46.05	4.62
119.2	71.58	8.9
113.17	60.44	13.67
158.33		4.23
145.27		3.43
189.29		6.16
122.79
128.92
145.2
