# Supplementary material for: Spatiotemporal recruitment of the ubiquitin-specific protease USP8 directs endosome maturation
Source: eLife journal article supplement (doi:10.7554/elife.96353), 2024-04-16
Supplement: fig2-data1 [file elife-96353-fig2-data1-v1.zip]

## Sheet: volume of 2xFYVE
wt	usp-50(gk632973)	usp-50(xd413)
0.0432	0.0432	0.0432
0.0432	0.0432	0.0432
0.0432	0.0432	0.0432
0.048	0.0432	0.0432
0.048	0.048	0.048
0.048	0.048	0.048
0.048	0.0528	0.048
0.048	0.0528	0.0528
0.0528	0.0528	0.0528
0.0528	0.0576	0.0528
0.0528	0.0576	0.0528
0.0576	0.0576	0.0576
0.0576	0.0576	0.0576
0.0576	0.0576	0.0576
0.0576	0.0576	0.0576
0.0576	0.0624	0.0576
0.0576	0.0624	0.0576
0.0624	0.0672	0.0576
0.0624	0.0672	0.0624
0.0624	0.072	0.0624
0.0624	0.072	0.0624
0.0672	0.0768	0.072
0.0672	0.0816	0.072
0.0672	0.0864	0.0816
0.0672	0.0864	0.096
0.072	0.0912	0.096
0.072	0.096	0.101
0.072	0.096	0.11
0.072	0.096	0.115
0.0768	0.101	0.115
0.0768	0.101	0.115
0.0768	0.101	0.115
0.0768	0.101	0.125
0.0816	0.101	0.125
0.0816	0.106	0.139
0.0816	0.106	0.158
0.0816	0.11	0.178
0.0816	0.11	0.178
0.0864	0.11	0.182
0.0864	0.115	0.192
0.0912	0.12	0.202
0.0912	0.12	0.216
0.0912	0.12	0.221
0.0912	0.12	0.264
0.0912	0.125	0.322
0.096	0.125	0.331
0.096	0.13	0.365
0.101	0.13	0.461
0.101	0.13	0.461
0.106	0.134	0.523
0.106	0.134	0.523
0.106	0.134	0.533
0.106	0.134	0.533
0.106	0.139	0.581
0.106	0.144	0.619
0.11	0.154	0.634
0.11	0.154	0.643
0.11	0.154	0.754
0.115	0.158	0.763
0.12	0.158	0.768
0.12	0.163	0.773
0.12	0.178	0.792
0.12	0.178	0.792
0.12	0.178	0.802
0.12	0.178	0.811
0.125	0.178	0.83
0.125	0.178	0.83
0.13	0.182	0.869
0.13	0.182	0.883
0.13	0.187	0.926
0.13	0.187	0.95
0.13	0.187	0.97
0.134	0.187	0.974
0.134	0.192	0.998
0.134	0.197	1
0.134	0.206	1.01
0.134	0.211	1.01
0.139	0.216	1.04
0.139	0.216	1.19
0.139	0.216	1.21
0.144	0.216	1.21
0.144	0.221	1.27
0.149	0.221	1.28
0.149	0.221	1.29
0.149	0.226	1.34
0.154	0.235	1.36
0.154	0.235	1.37
0.154	0.235	1.49
0.154	0.235	1.49
0.154	0.235	1.53
0.158	0.245	1.58
0.158	0.25	1.6
0.163	0.259	1.61
0.168	0.259	1.66
0.168	0.269	1.82
0.173	0.274	1.93
0.173	0.288	2.06
0.173	0.293	2.1
0.178	0.293	2.16
0.178	0.298	2.22
0.178	0.302	2.25
0.178	0.307	2.25
0.182	0.307	2.31
0.182	0.312	2.32
0.187	0.312	2.37
0.192	0.312	2.43
0.192	0.322	2.48
0.192	0.322	2.52
0.192	0.322	2.64
0.197	0.326	2.8
0.197	0.341	2.85
0.197	0.35	2.86
0.197	0.365	2.93
0.197	0.37	3.03
0.197	0.374	3.08
0.202	0.374	3.11
0.202	0.374	3.28
0.202	0.379	3.36
0.202	0.384	3.36
0.206	0.394	3.4
0.206	0.398	3.42
0.211	0.398	3.44
0.211	0.403	3.55
0.211	0.408	3.6
0.216	0.413	3.61
0.216	0.413	3.69
0.216	0.413	3.71
0.221	0.418	3.87
0.221	0.422	4.05
0.221	0.422	4.15
0.221	0.422	4.19
0.226	0.427	4.29
0.226	0.427	4.32
0.226	0.432	4.38
0.226	0.437	4.44
0.23	0.446	4.46
0.23	0.446	4.54
0.23	0.451	4.55
0.235	0.456	4.59
0.235	0.466	4.61
0.235	0.466	4.63
0.235	0.475	4.63
0.24	0.475	4.81
0.24	0.48	4.92
0.245	0.485	5.25
0.245	0.485	5.35
0.25	0.485	5.35
0.254	0.49	5.43
0.254	0.504	5.56
0.254	0.514	5.6
0.254	0.514	5.62
0.259	0.518	6.22
0.259	0.523	6.39
0.259	0.523	6.61
0.264	0.523	6.67
0.269	0.533	6.84
0.269	0.542	6.95
0.269	0.557	7.07
0.269	0.557	8.49
0.269	0.557	8.6
0.274	0.562	8.63
0.274	0.566	8.79
0.274	0.571	8.83
0.278	0.595	9.33
0.278	0.61	10.23
0.278	0.629	11.59
0.278	0.658	11.78
0.278	0.658	12.27
0.283	0.662	15.54
0.283	0.672	16.61
0.288	0.706	19.33
0.288	0.715	20.66
0.293	0.72	23.39
0.293	0.73
0.293	0.73
0.298	0.739
0.298	0.744
0.298	0.749
0.298	0.754
0.302	0.754
0.302	0.754
0.307	0.754
0.307	0.763
0.312	0.778
0.312	0.782
0.312	0.787
0.312	0.787
0.312	0.811
0.317	0.816
0.322	0.826
0.322	0.83
0.326	0.835
0.326	0.84
0.326	0.859
0.326	0.893
0.331	0.907
0.341	0.917
0.35	0.922
0.35	0.931
0.35	0.941
0.35	0.95
0.355	0.955
0.355	0.955
0.355	0.96
0.36	0.989
0.36	0.989
0.36	1.06
0.365	1.08
0.365	1.08
0.365	1.11
0.37	1.11
0.37	1.13
0.37	1.17
0.374	1.18
0.379	1.2
0.379	1.2
0.384	1.2
0.384	1.22
0.384	1.23
0.389	1.31
0.394	1.32
0.394	1.39
0.398	1.41
0.398	1.45
0.403	1.47
0.408	1.47
0.408	1.48
0.408	1.5
0.408	1.51
0.408	1.54
0.413	1.56
0.413	1.56
0.413	1.56
0.413	1.59
0.413	1.61
0.418	1.64
0.418	1.7
0.418	1.7
0.418	1.71
0.418	1.71
0.427	1.73
0.432	1.74
0.432	1.76
0.437	1.82
0.446	1.9
0.451	1.91
0.461	1.92
0.461	1.95
0.466	1.99
0.466	1.99
0.47	1.99
0.47	2.01
0.47	2.03
0.475	2.09
0.475	2.09
0.49	2.13
0.49	2.2
0.494	2.22
0.494	2.24
0.499	2.37
0.499	2.38
0.504	2.39
0.509	2.4
0.514	2.4
0.514	2.41
0.523	2.42
0.528	2.46
0.533	2.46
0.538	2.48
0.538	2.49
0.538	2.49
0.542	2.54
0.562	2.55
0.562	2.55
0.566	2.6
0.571	2.62
0.571	2.64
0.586	2.67
0.595	2.7
0.595	2.71
0.595	2.72
0.6	2.74
0.605	2.78
0.605	2.79
0.61	2.91
0.619	2.94
0.638	2.99
0.643	3.01
0.653	3.03
0.662	3.06
0.672	3.1
0.677	3.22
0.686	3.22
0.686	3.28
0.691	3.3
0.696	3.36
0.696	3.37
0.701	3.38
0.706	3.43
0.715	3.48
0.744	3.52
0.754	3.52
0.768	3.76
0.773	3.95
0.773	4.02
0.773	4.53
0.778	4.67
0.782	4.68
0.782	5.04
0.787	5.32
0.787	5.59
0.797	5.71
0.797	5.9
0.797	5.9
0.816	5.98
0.816	6.12
0.826	6.6
0.826	6.67
0.83	6.83
0.84	7.44
0.845	8.81
0.859
0.864
0.869
0.878
0.883
0.883
0.898
0.898
0.907
0.907
0.907
0.926
0.941
0.946
0.96
0.96
0.974
0.984
1.01
1.01
1.03
1.04
1.04
1.05
1.06
1.07
1.07
1.07
1.08
1.08
1.09
1.1
1.11
1.12
1.12
1.14
1.17
1.17
1.18
1.2
1.2
1.21
1.21
1.21
1.23
1.24
1.24
1.24
1.27
1.3
1.3
1.32
1.33
1.34
1.35
1.36
1.37
1.38
1.4
1.4
1.4
1.4
1.43
1.44
1.44
1.44
1.45
1.48
1.53
1.56
1.58
1.59
1.6
1.62
1.63
1.64
1.68
1.69
1.71
1.74
1.74
1.74
1.74
1.8
1.82
1.85
1.86
1.91
1.92
1.93
2.01
2.02
2.05
2.08
2.11
2.12
2.16
2.19
2.21
2.22
2.29
2.32
2.35
2.37
2.41
2.41
2.54
2.59
2.64
2.69
2.72
2.79
2.83
2.86
2.88
2.91
2.98
3.1
3.32
3.58
4.5
5.54
6.25

## Sheet: total volume of 2xFYVE
wt	usp-50(gk632973)	usp-50(xd413)
56.34	14.26	53.17
20.49	33.85	26.11
22.36	29.93	74.03
41.61	17.68	21.17
20.2858	55.92	60.17
31.33	27.64	19.11
33.04	57.72	92.1434
12.12	44.96	96.06
58.14	67.75	20.77
100.69	40.74	36.57
	33.97	28.72
		37.76
		40.68

## Sheet: number of 2xFYVE
wt	usp-50(gk632973)	usp-50(xd413)
51	19	14
38	25	7
42	37	37
52	26	20
45	51	29
54	26	11
48	51	27
38	32	14
191	33	6
276	21	8
	22	19
		9
		27
