# Supplementary material for: Spatiotemporal recruitment of the ubiquitin-specific protease USP8 directs endosome maturation
Source: eLife journal article supplement (doi:10.7554/elife.96353), 2024-04-16
Supplement: fig2-data1 [file Fig. 2K.xlsx]

## Sheet: No. of large spots
WT	USP8-KO
0	0.000869854
0	0.000774122
0	0
0	0.00219185
0	0
0	0.00085563
0	0.00235518
0	0.00136833
0	0.00303644
0	0
0	0.0030135
0	0.00116552
0	0.00216492
0	0.00260988
0	0.00262731
0	0
0	0.00114373
0.000590619	0
0	0
0	0.000401353
0	0.00103882
0	0.00214116
0	0.000697804
0	0.00165954
0	0
0	0.00482357
0	0
0	0.000791328
0	0.00183364
0	0.00157139
0	0.00120407
0	0.00153317
0	0.00306009
0	0.0014359
0.000776859	0.00483704
0	0
0	0.000537881
0	0.00188814
	0
	0
	0.00074665
	0.00196691
	0.00138405
	0.00313646
	0.00190079
	0.00191468
	0.00170672
	0
	0.00324129
	0.00182656
	0
