# Supplementary material for: Spatiotemporal recruitment of the ubiquitin-specific protease USP8 directs endosome maturation
Source: eLife journal article supplement (doi:10.7554/elife.96353), 2024-04-16

**Figure 2-S1C**

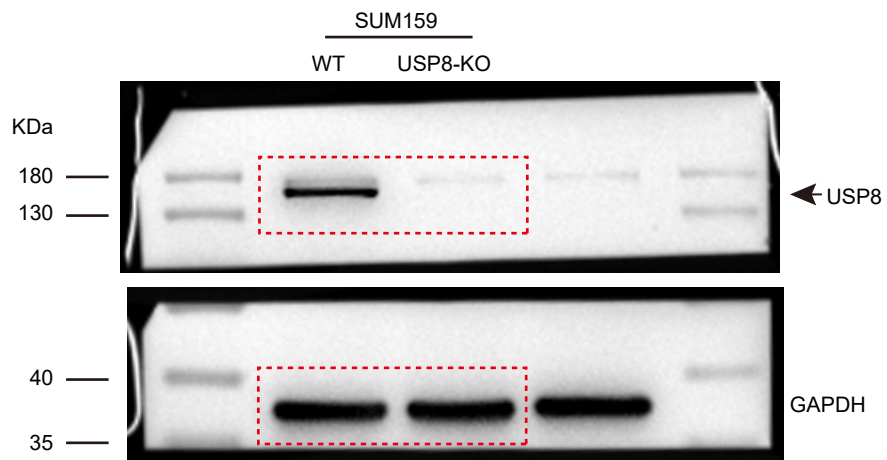

Supplement: fig2-figsupp1-data2 [file elife-96353-fig2-figsupp1-data2-v1.pdf]
