# Supplementary material for: Spatiotemporal recruitment of the ubiquitin-specific protease USP8 directs endosome maturation
Source: eLife journal article supplement (doi:10.7554/elife.96353), 2024-04-16
Supplement: fig2-figsupp1-data3 [file elife-96353-fig2-figsupp1-data3-v1.zip]

## Sheet: volume of 2xFYVE
wt	usp-50(xd413)	usp-50(xd413); hyp USP-50	usp-50(xd413); mus USP-50	usp-50(xd413); gut USP-50	usp-50(xd413); Pusp-50::USP-50	usp-50(xd413); Pusp-50::hUSP8
0.0432	0.0432	0.0432	2.02	0.312	0.946	0.0432
0.0432	0.0432	0.0432	2.51	5.82	0.816	0.0432
0.0432	0.0432	0.0432	12.21	0.0528	0.0816	0.0432
0.048	0.0432	0.0432	0.72	0.974	0.307	0.0432
0.048	0.048	0.0432	0.73	5	0.341	0.0432
0.048	0.048	0.0432	0.0672	0.293	0.254	0.0432
0.048	0.048	0.0432	0.59	0.206	0.254	0.0432
0.048	0.0528	0.048	2.04	0.12	0.566	0.0432
0.0528	0.0528	0.048	9.44	0.0672	1	0.048
0.0528	0.0528	0.0528	12.85	0.11	0.216	0.048
0.0528	0.0528	0.0528	0.922	0.048	0.418	0.048
0.0576	0.0576	0.0528	0.494	0.048	0.12	0.0528
0.0576	0.0576	0.0576	0.221	0.23	0.298	0.0528
0.0576	0.0576	0.0576	0.797	0.768	0.442	0.0528
0.0576	0.0576	0.0576	11.25	0.149	0.595	0.0528
0.0576	0.0576	0.0576	5.95	0.0816	0.134	0.0528
0.0576	0.0576	0.0624	0.634	1.11	0.643	0.0576
0.0624	0.0576	0.0624	0.264	1.59	0.581	0.0576
0.0624	0.0624	0.0624	9.92	0.072	0.384	0.0576
0.0624	0.0624	0.0624	11.27	6.64	0.754	0.0576
0.0624	0.0624	0.0624	0.504	7.67	1.51	0.0576
0.0672	0.072	0.0624	0.734	0.048	1.24	0.0624
0.0672	0.072	0.0672	0.211	0.0576	0.245	0.0624
0.0672	0.0816	0.0672	0.49	3.4	0.125	0.0624
0.0672	0.096	0.0672	0.154	0.139	0.048	0.0624
0.072	0.096	0.0672	0.11	6.47	1.08	0.0624
0.072	0.101	0.072	0.254	0.072	1.6	0.0624
0.072	0.11	0.072	0.158	39.7	0.422	0.0624
0.072	0.115	0.072	0.115	0.235	0.254	0.0624
0.0768	0.115	0.072	0.0816	11.13	2.01	0.0672
0.0768	0.115	0.0816	0.0672	0.0672	1.31	0.0672
0.0768	0.115	0.0864	0.998	0.85	1.72	0.0672
0.0768	0.125	0.0912	12.44	2.78	0.571	0.0672
0.0816	0.125	0.0912	1.75	2.15	0.0768	0.0672
0.0816	0.139	0.0912	17.04	0.336	0.48	0.072
0.0816	0.158	0.0912	3.3	0.096	0.144	0.072
0.0816	0.178	0.0912	1.61	0.302	0.806	0.072
0.0816	0.178	0.0912	0.427	0.0816	0.101	0.0768
0.0864	0.182	0.096	0.072	0.475	0.154	0.0768
0.0864	0.192	0.096	0.221	0.629	0.398	0.0768
0.0912	0.202	0.101	8.78	3.31	0.072	0.0768
0.0912	0.216	0.101	1.99	0.106	0.869	0.0768
0.0912	0.221	0.101	9.72	0.619	0.24	0.0768
0.0912	0.264	0.106	2.19	0.096	0.562	0.0816
0.0912	0.322	0.106	0.274	0.979	0.0576	0.0816
0.096	0.331	0.106	10.32	1.22	0.0912	0.0864
0.096	0.365	0.106	0.0768	0.163	0.106	0.0864
0.101	0.461	0.11	15.28	5.05	0.178	0.0912
0.101	0.461	0.11	0.264	3.72	0.24	0.0912
0.106	0.523	0.115	1.29	0.048	1.03	0.0912
0.106	0.523	0.115	1.34	20.29	0.154	0.0912
0.106	0.533	0.115	2.56	0.096	1.24	0.096
0.106	0.533	0.115	0.158	12.56	2.31	0.101
0.106	0.581	0.115	0.432	2.76	0.346	0.101
0.106	0.619	0.115	0.096	7.97	0.206	0.101
0.11	0.634	0.12	2.43	5.87	1.68	0.101
0.11	0.643	0.12	2.12	1.53	0.451	0.101
0.11	0.754	0.12	1.65	0.24	0.61	0.106
0.115	0.763	0.12	0.509	10.43	0.269	0.106
0.12	0.768	0.12	0.312	0.0816	0.187	0.106
0.12	0.773	0.125	0.0672	0.24	0.811	0.106
0.12	0.792	0.125	0.187	0.682	0.389	0.106
0.12	0.792	0.13	0.83	0.0432	1.08	0.11
0.12	0.802	0.13	4.05	0.0816	0.451	0.11
0.12	0.811	0.13	2.91	7.11	0.71	0.115
0.125	0.83	0.13	2.31	10.08	0.202	0.115
0.125	0.83	0.13	2.55	1.05	0.221	0.115
0.13	0.869	0.134	13.34	1.06	0.298	0.12
0.13	0.883	0.134	0.139	0.0672	0.235	0.125
0.13	0.926	0.134	0.154	0.595	2.84	0.125
0.13	0.95	0.139	5.89	1.68	0.355	0.125
0.13	0.97	0.149	0.11	0.0624	0.245	0.13
0.134	0.974	0.149	0.398	0.115	0.494	0.13
0.134	0.998	0.149	0.466	12.58	0.11	0.13
0.134	1	0.154	4.36	9.84	0.0432	0.13
0.134	1.01	0.154	1.58	0.0432	0.331	0.13
0.134	1.01	0.154	3.72	0.0528	0.288	0.13
0.139	1.04	0.163	5.94	0.514	0.701	0.13
0.139	1.19	0.168	3.53	1.84	2.03	0.134
0.139	1.21	0.168	2.76	0.13	0.936	0.144
0.144	1.21	0.168	27.8	0.494	0.576	0.149
0.144	1.27	0.173	1.3	1.24	0.576	0.149
0.149	1.28	0.173	3.35	0.187	1	0.149
0.149	1.29	0.173	0.418	0.096	0.384	0.154
0.149	1.34	0.178	0.35	5.74	0.408	0.158
0.154	1.36	0.178	0.97	5.74	0.936	0.158
0.154	1.37	0.178	0.216	24.73	1.06	0.158
0.154	1.49	0.182	0.629	1.41	1.64	0.158
0.154	1.49	0.182	6.1	1.22	0.192	0.163
0.154	1.53	0.182	8.83	0.0624	2.01	0.163
0.158	1.58	0.187	13.85	10.58	0.422	0.163
0.158	1.6	0.187	3.24	0.211	0.514	0.168
0.163	1.61	0.187	2.15	0.72	0.202	0.168
0.168	1.66	0.187	1.29	1.2	0.408	0.168
0.168	1.82	0.187	0.442	0.048	1.73	0.173
0.173	1.93	0.187	2.88	1.92	1.75	0.173
0.173	2.06	0.192	0.461	12.95	0.562	0.182
0.173	2.1	0.197	0.139	0.802	0.0864	0.182
0.178	2.16	0.202	6.47	3.92	0.106	0.182
0.178	2.22	0.202	3.18	0.61	0.773	0.187
0.178	2.25	0.202	0.317	3.86	0.264	0.187
0.178	2.25	0.202	0.427	0.854	0.437	0.192
0.182	2.31	0.202	0.154	0.629	0.6	0.197
0.182	2.32	0.206	0.389	4.18	0.048	0.197
0.187	2.37	0.206	0.125	1.01	0.384	0.197
0.192	2.43	0.206	0.0912	0.97	0.101	0.197
0.192	2.48	0.211	4.63	0.84	0.302	0.197
0.192	2.52	0.211	0.629	4.54	0.163	0.202
0.192	2.64	0.211	0.619	0.595	0.691	0.202
0.197	2.8	0.211	0.048	0.154	0.59	0.206
0.197	2.85	0.216	0.139	3.36	0.154	0.211
0.197	2.86	0.216	0.23	1.27	0.528	0.211
0.197	2.93	0.216	5.76	1.2	0.384	0.211
0.197	3.03	0.216	0.0528	0.11	0.542	0.216
0.197	3.08	0.226	0.211	0.6	0.725	0.216
0.202	3.11	0.23	1.28	3.34	0.427	0.216
0.202	3.28	0.23	6.08	3.44	2.12	0.221
0.202	3.36	0.235	8.4	0.254	0.293	0.221
0.202	3.36	0.235	7.72	0.758	1.24	0.221
0.206	3.4	0.24	0.605	2.18	0.974	0.226
0.206	3.42	0.24	1.35	0.715	0.936	0.23
0.211	3.44	0.24	6.12	1.71	0.264	0.23
0.211	3.55	0.245	3.24	2.69	0.854	0.23
0.211	3.6	0.25	1	0.538	0.854	0.23
0.216	3.61	0.25	1.68	0.859	0.11	0.23
0.216	3.69	0.25	3.87	0.158	0.552	0.235
0.216	3.71	0.264	1.15	0.0432	0.269	0.24
0.221	3.87	0.269	0.806	4.88	0.494	0.245
0.221	4.05	0.269	2.76	0.149	0.0624	0.25
0.221	4.15	0.274	0.254	1.9	1.35	0.254
0.221	4.19	0.274	0.787	0.269	0.845	0.254
0.226	4.29	0.274	0.048	0.59	0.322	0.259
0.226	4.32	0.283	4.94	0.518	0.197	0.259
0.226	4.38	0.283	1.42	1.4	0.158	0.264
0.226	4.44	0.283	13.51	1.76	0.6	0.274
0.23	4.46	0.288	5.89	0.283	1.29	0.278
0.23	4.54	0.293	6.01	1.11	0.96	0.278
0.23	4.55	0.293	2.66	2.94	0.149	0.278
0.235	4.59	0.298	0.259	0.0528	0.437	0.278
0.235	4.61	0.302	1.92	1.84	0.528	0.283
0.235	4.63	0.302	4.13	3.56	0.542	0.283
0.235	4.63	0.302	0.384	29.75	0.499	0.288
0.24	4.81	0.312	0.158	2.72	1.24	0.288
0.24	4.92	0.312	1.6	4.09	0.096	0.302
0.245	5.25	0.322	0.696	1.66	1.12	0.302
0.245	5.35	0.322	1.61	2.3	0.542	0.302
0.25	5.35	0.326	1.48	0.85	0.216	0.307
0.254	5.43	0.326	8.46	2.72	1.18	0.307
0.254	5.56	0.326	0.0768	1.53	1.09	0.307
0.254	5.6	0.326	0.24	3.36	1.71	0.307
0.254	5.62	0.331	0.778	0.173	0.413	0.307
0.259	6.22	0.331	0.0624	0.542	0.269	0.307
0.259	6.39	0.331	0.374	6.94	0.322	0.312
0.259	6.61	0.331	0.0672	9.84	0.259	0.317
0.264	6.67	0.346	3.83	1.09	0.394	0.317
0.269	6.84	0.346	9.69	0.0528	0.168	0.322
0.269	6.95	0.35	5.64	0.048	1.08	0.322
0.269	7.07	0.355	0.0624	0.0432	0.0672	0.322
0.269	8.49	0.36	1.88	0.317	0.682	0.331
0.269	8.6	0.365	7.3	0.773	0.888	0.331
0.274	8.63	0.365	2.11	7.76	0.955	0.331
0.274	8.79	0.379	1.88	2.27	0.715	0.336
0.274	8.83	0.384	2.64	0.158	0.49	0.341
0.278	9.33	0.384	0.134	6.94	0.202	0.341
0.278	10.23	0.398	0.0432	14.39	0.254	0.341
0.278	11.59	0.403	0.192	0.072	0.6	0.341
0.278	11.78	0.413	0.25	0.725	0.72	0.346
0.278	12.27	0.413	0.13	1.32	0.595	0.346
0.283	15.54	0.418	0.35	6.69	0.768	0.346
0.283	16.61	0.418	1.34	1.07	0.504	0.35
0.288	19.33	0.422	0.048	0.418	0.254	0.35
0.288	20.66	0.432	0.134	0.0912	1.21	0.355
0.293	23.39	0.432	1.87	0.0576	0.374	0.355
0.293		0.432	0.0768	1.36	0.547	0.355
0.293		0.432	12.79	8.09	0.864	0.355
0.298		0.432	0.096	0.13	0.653	0.36
0.298		0.437	1.12	0.115	0.0576	0.36
0.298		0.437	0.0624	0.331	0.106	0.37
0.298		0.437	0.403	0.221	0.269	0.374
0.302		0.437	4.82	0.0816	0.197	0.374
0.302		0.442	10.71	0.504	0.768	0.374
0.307		0.442	0.163	0.12	0.619	0.374
0.307		0.442	5.11	2.28	0.926	0.384
0.312		0.442	21.77	0.0624	0.398	0.384
0.312		0.442	4.19	0.134	0.456	0.384
0.312		0.446	12.58	3.34	0.83	0.389
0.312		0.446	0.134	8.48	0.907	0.394
0.312		0.451	0.192	6.7	0.571	0.394
0.317		0.456	0.25	0.379	0.312	0.394
0.322		0.456	0.13	7.8	1.4	0.394
0.322		0.47	0.35	13.05	0.634	0.398
0.326		0.475	1.34	1.07	1.45	0.408
0.326		0.48	0.048	1.13	0.278	0.408
0.326		0.48	0.134	0.0432	1.15	0.408
0.326		0.494	1.87	1.41	0.514	0.413
0.331		0.494	0.0768	0.259	0.346	0.418
0.341		0.499	12.79	24.28	0.734	0.422
0.35		0.504	0.096	2.92	0.634	0.422
0.35		0.509	0.115	0.115	0.346	0.427
0.35		0.514	1.12	0.0432	0.25	0.432
0.35		0.518	0.0624	1.6	0.408	0.442
0.355		0.528	4.82	3.12	0.547	0.446
0.355		0.533	10.71	0.725	0.634	0.451
0.355		0.538	0.163	0.072	1.21	0.451
0.36		0.542	5.11	0.0432	0.0768	0.47
0.36		0.547	21.77	1.18	0.475	0.485
0.36		0.552	4.19	1.09	0.643	0.49
0.365		0.557	12.58	6.86	1.54	0.504
0.365		0.566	0.379	0.0576	0.158	0.509
0.365		0.571	3.62	0.0576	1.09	0.518
0.37		0.581	4.29	5.38	0.518	0.518
0.37		0.581	1.14	0.0432	0.317	0.518
0.37		0.581	2.13	0.365	0.072	0.518
0.374		0.581	0.686	0.322	0.326	0.523
0.379		0.586	2.02	0.0576	0.211	0.523
0.379		0.595	0.643	0.101	0.192	0.528
0.384		0.595	3.08	2.33	0.634	0.533
0.384		0.605	5.44	0.0528	2.24	0.533
0.384		0.605	6.48	14.79	0.533	0.538
0.389		0.605	1.08	0.288	0.73	0.538
0.394		0.605	6.64	15.37	0.278	0.542
0.394		0.605	0.912	7.39	0.235	0.542
0.398		0.605	0.096	21.18	0.134	0.542
0.398		0.61	1.35	3.22	0.322	0.552
0.403		0.619	1.65		0.461	0.557
0.408		0.619	3.08		0.677	0.562
0.408		0.634	3.12		0.494	0.571
0.408		0.648	2.31		0.0768	0.581
0.408		0.648	14.76		0.475	0.586
0.408		0.667	4.66		0.0576	0.586
0.413		0.677	1.97		0.206	0.586
0.413		0.682	0.802		0.547	0.59
0.413		0.696	0.763		0.0912	0.59
0.413		0.696	4.28		0.494	0.605
0.413		0.701	1.67		0.946	0.605
0.418		0.71	9.35		0.346	0.605
0.418		0.715			0.278	0.624
0.418		0.72			0.998	0.629
0.418		0.72			0.0432	0.634
0.418		0.72			0.269	0.638
0.427		0.73			0.922	0.638
0.432		0.73			0.35	0.643
0.432		0.73			0.0864	0.648
0.437		0.739			1.28	0.658
0.446		0.739			0.13	0.662
0.451		0.754			1.72	0.667
0.461		0.754			0.461	0.672
0.461		0.758			0.634	0.686
0.466		0.778			1.61	0.691
0.466		0.782			1.63	0.691
0.47		0.782			0.787	0.706
0.47		0.792			1.21	0.715
0.47		0.792			0.144	0.72
0.475		0.806			1.15	0.72
0.475		0.806			0.346	0.725
0.49		0.806			2.76	0.725
0.49		0.806			0.835	0.73
0.494		0.816			0.754	0.749
0.494		0.821			0.72	0.758
0.499		0.826			0.984	0.778
0.499		0.835			0.216	0.782
0.504		0.835			0.0912	0.792
0.509		0.84			0.254	0.806
0.514		0.84			0.49	0.811
0.514		0.845			0.254	0.816
0.523		0.845			1.7	0.821
0.528		0.85			0.341	0.83
0.533		0.85			0.144	0.835
0.538		0.859			0.221	0.84
0.538		0.893			0.106	0.845
0.538		0.922			0.0624	0.85
0.542		0.936			0.446	0.864
0.562		0.946			0.0432	0.864
0.562		0.946			0.0768	0.864
0.566		0.955			0.197	0.869
0.571		0.965			0.158	0.878
0.571		0.965			0.149	0.893
0.586		0.965			0.0624	0.917
0.595		0.97			0.0432	0.917
0.595		0.974			0.586	0.931
0.595		1.03			0.0816	0.946
0.6		1.03			0.106	0.955
0.605		1.04			0.878	0.994
0.605		1.05				1
0.61		1.07				1.01
0.619		1.08				1.02
0.638		1.08				1.02
0.643		1.1				1.07
0.653		1.1				1.09
0.662		1.11				1.12
0.672		1.12				1.14
0.677		1.12				1.14
0.686		1.13				1.15
0.686		1.13				1.17
0.691		1.15				1.21
0.696		1.17				1.23
0.696		1.17				1.23
0.701		1.17				1.24
0.706		1.19				1.24
0.715		1.2				1.25
0.744		1.2				1.25
0.754		1.22				1.26
0.768		1.22				1.26
0.773		1.23				1.3
0.773		1.25				1.31
0.773		1.27				1.33
0.778		1.31				1.34
0.782		1.32				1.37
0.782		1.32				1.47
0.787		1.35				1.49
0.787		1.37				1.51
0.797		1.4				1.53
0.797		1.4				1.53
0.797		1.41				1.54
0.816		1.53				1.68
0.816		1.53				1.68
0.826		1.56				1.69
0.826		1.64				1.7
0.83		1.67				1.73
0.84		1.7				1.78
0.845		1.77				1.81
0.859		1.85				1.85
0.864		2.1				1.86
0.869		2.18				1.87
0.878		2.22				1.89
0.883		2.22				1.93
0.883		2.37				1.98
0.898		2.39				2.04
0.898		2.51				2.4
0.907		2.54				2.49
0.907		2.77				2.5
0.907		2.87				2.6
0.926		2.96				4.09
0.941		3.25				4.41
0.946						5.02
0.96
0.96
0.974
0.984
1.01
1.01
1.03
1.04
1.04
1.05
1.06
1.07
1.07
1.07
1.08
1.08
1.09
1.1
1.11
1.12
1.12
1.14
1.17
1.17
1.18
1.2
1.2
1.21
1.21
1.21
1.23
1.24
1.24
1.24
1.27
1.3
1.3
1.32
1.33
1.34
1.35
1.36
1.37
1.38
1.4
1.4
1.4
1.4
1.43
1.44
1.44
1.44
1.45
1.48
1.53
1.56
1.58
1.59
1.6
1.62
1.63
1.64
1.68
1.69
1.71
1.74
1.74
1.74
1.74
1.8
1.82
1.85
1.86
1.91
1.92
1.93
2.01
2.02
2.05
2.08
2.11
2.12
2.16
2.19
2.21
2.22
2.29
2.32
2.35
2.37
2.41
2.41
2.54
2.59
2.64
2.69
2.72
2.79
2.83
2.86
2.88
2.91
2.98
3.1
3.32
3.58
4.5
5.54
6.25
