# Supplementary material for: Spatiotemporal recruitment of the ubiquitin-specific protease USP8 directs endosome maturation
Source: eLife journal article supplement (doi:10.7554/elife.96353), 2024-04-16
Supplement: fig4-data2 [file elife-96353-fig4-data2-v1.pdf]

Figure 4A

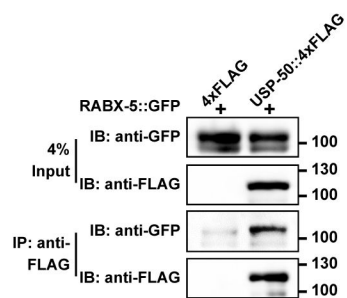

RABX-5::GFP + 4xFLAG + USP-50::4xFLAG

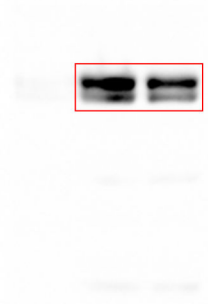

IB: anti-GFP

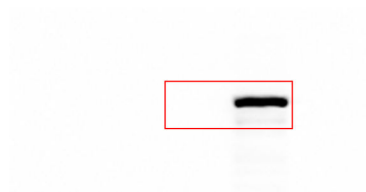

IB: anti-FLAG

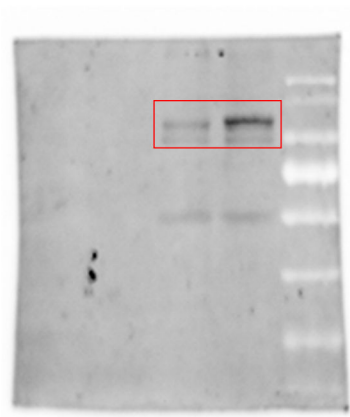

IB: anti-GFP

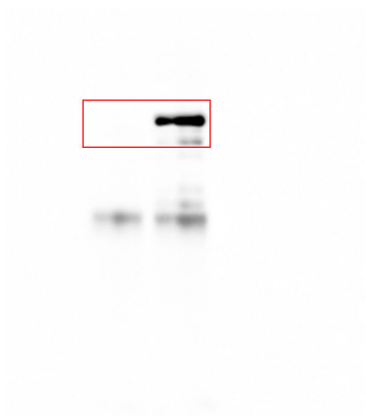

IB: anti-FLAG
