# Supplementary material for: Spatiotemporal recruitment of the ubiquitin-specific protease USP8 directs endosome maturation
Source: eLife journal article supplement (doi:10.7554/elife.96353), 2024-04-16
Supplement: fig4-data7 [file elife-96353-fig4-data7-v1.zip]

## Sheet: Sheet1
wt	usp-50(xd413)	rabx-5(xd548)	rabx-5(xd548); usp-50(xd413)
0.0432	0.0432	0.456	0.293
0.0432	0.0432	0.763	1.34
0.0432	0.0432	1.63	0.0768
0.048	0.0432	0.85	1.41
0.048	0.048	0.686	2.04
0.048	0.048	0.0528	1.46
0.048	0.048	0.634	1.16
0.048	0.0528	0.384	0.864
0.0528	0.0528	0.394	1.42
0.0528	0.0528	0.106	0.235
0.0528	0.0528	0.451	0.408
0.0576	0.0576	0.509	0.595
0.0576	0.0576	0.475	0.49
0.0576	0.0576	0.605	0.787
0.0576	0.0576	0.341	1.09
0.0576	0.0576	0.48	1.11
0.0576	0.0576	0.485	0.072
0.0624	0.0576	0.0528	0.677
0.0624	0.0624	0.35	1.68
0.0624	0.0624	0.13	1.12
0.0624	0.0624	0.173	1.94
0.0672	0.072	0.187	1.14
0.0672	0.072	0.811	0.25
0.0672	0.0816	0.0672	0.514
0.0672	0.096	1.03	0.557
0.072	0.096	0.0768	0.538
0.072	0.101	0.749	0.518
0.072	0.11	0.264	3.67
0.072	0.115	0.182	0.168
0.0768	0.115	0.595	0.226
0.0768	0.115	0.0432	0.95
0.0768	0.115	0.245	0.71
0.0768	0.125	0.226	1.39
0.0816	0.125	0.806	0.413
0.0816	0.139	0.12	0.461
0.0816	0.158	0.0432	1.2
0.0816	0.178	0.998	0.451
0.0816	0.178	2.23	0.0672
0.0864	0.182	1.72	0.0624
0.0864	0.192	0.581	1.22
0.0912	0.202	0.878	2.19
0.0912	0.216	0.49	2.36
0.0912	0.221	0.912	0.422
0.0912	0.264	0.984	0.955
0.0912	0.322	0.25	1.62
0.096	0.331	0.595	1.31
0.096	0.365	2.32	0.758
0.101	0.461	0.97	0.278
0.101	0.461	0.658	1.06
0.106	0.523	0.461	0.648
0.106	0.523	0.302	0.202
0.106	0.533	0.302	0.499
0.106	0.533	0.701	0.763
0.106	0.581	0.278	0.192
0.106	0.619	0.216	1.06
0.11	0.634	1.81	1.62
0.11	0.643	0.816	0.442
0.11	0.754	0.168	0.634
0.115	0.763	0.36	1.18
0.12	0.768	0.302	0.792
0.12	0.773	0.523	1.27
0.12	0.792	0.778	0.552
0.12	0.792	0.269	1.17
0.12	0.802	0.547	0.605
0.12	0.811	0.149	1.11
0.125	0.83	0.0864	0.754
0.125	0.83	0.072	1.01
0.13	0.869	0.715	2.15
0.13	0.883	0.0528	0.946
0.13	0.926	0.0432	0.206
0.13	0.95	1.04	0.811
0.13	0.97	0.0624	0.326
0.134	0.974	1.54	0.288
0.134	0.998	0.83	0.283
0.134	1	0.955	0.0624
0.134	1.01	0.221	1.05
0.134	1.01	1.18	1.24
0.139	1.04	0.845	1.56
0.139	1.19	1.08	1.48
0.139	1.21	1.8	2.88
0.144	1.21	1.15	0.658
0.144	1.27	1.48	2.08
0.149	1.28	1.32	1.26
0.149	1.29	0.864	2.46
0.149	1.34	0.485	1.45
0.154	1.36	0.365	1.05
0.154	1.37	0.312	0.725
0.154	1.49	0.931	1.53
0.154	1.49	1.13	0.946
0.154	1.53	0.778	0.778
0.158	1.58	0.422	2.55
0.158	1.6	1.2	0.994
0.163	1.61	1.67	1.17
0.168	1.66	0.965	1.51
0.168	1.82	0.59	1.22
0.173	1.93	0.13	0.73
0.173	2.06	0.226	0.6
0.173	2.1	0.245	0.0768
0.178	2.16	0.0912	0.878
0.178	2.22	0.85	0.144
0.178	2.25	0.974	2.32
0.178	2.25	0.226	0.307
0.182	2.31	0.11	0.211
0.182	2.32	0.336	0.25
0.187	2.37	0.787	0.706
0.192	2.43	0.542	0.677
0.192	2.48	0.178	0.442
0.192	2.52	0.355	0.125
0.192	2.64	0.125	0.72
0.197	2.8	0.398	2.47
0.197	2.85	0.192	1.13
0.197	2.86	0.13	1.87
0.197	2.93	1.44	1.58
0.197	3.03	0.61	2.11
0.197	3.08	1.36	2.09
0.202	3.11	0.514	0.787
0.202	3.28	1.39	0.898
0.202	3.36	1.29	1.49
0.202	3.36	0.523	1.04
0.206	3.4	0.821	1.69
0.206	3.42	2.26	0.422
0.211	3.44	0.538	0.581
0.211	3.55	1.37	2.75
0.211	3.6	0.84	0.312
0.216	3.61	1.09	0.322
0.216	3.69	1.18	0.206
0.216	3.71	0.202	0.466
0.221	3.87	0.902	3.36
0.221	4.05	0.552	0.802
0.221	4.15	0.648	0.73
0.221	4.19	1.29	0.173
0.226	4.29	0.542	0.11
0.226	4.32	0.245	1.59
0.226	4.38	0.106	1.98
0.226	4.44	0.552	1.19
0.23	4.46	0.182	0.797
0.23	4.54	0.187	1.02
0.23	4.55	0.048	1.6
0.235	4.59	0.144	0.466
0.235	4.61	0.0624	1.06
0.235	4.63	0.24	0.696
0.235	4.63	0.0432	0.384
0.24	4.81	0.547	0.71
0.24	4.92	0.0432	0.206
0.245	5.25	0.25	1.66
0.245	5.35	0.528	2.32
0.25	5.35	0.274	0.648
0.254	5.43	0.182	1.53
0.254	5.56	0.149	0.374
0.254	5.6	0.0912	0.365
0.254	5.62	0.653	0.571
0.259	6.22	0.811	1.34
0.259	6.39	1.12	0.47
0.259	6.61	1.22	1.19
0.264	6.67	1.4	2.88
0.269	6.84	2.06	1.41
0.269	6.95	1.6	0.989
0.269	7.07	0.326	0.634
0.269	8.49	0.274	0.293
0.269	8.6	1.23	0.0576
0.274	8.63	0.245	0.835
0.274	8.79	1.41	0.307
0.274	8.83	0.437	0.288
0.278	9.33	0.888	0.0432
0.278	10.23	1.04	0.0912
0.278	11.59	1.21	0.293
0.278	11.78	0.398	0.269
0.278	12.27	0.293	0.456
0.283	15.54	0.096	0.514
0.283	16.61	2.72	0.384
0.288	19.33	0.0624	1.22
0.288	20.66	0.12	1.46
0.293	23.39	3	1.09
0.293		0.173	0.826
0.293		0.0528	2.76
0.298		0.427	0.667
0.298		1.48	0.71
0.298		1.15	0.566
0.298		2.69	1.28
0.302		0.331	0.538
0.302		0.23	0.859
0.307		2.02	0.898
0.307		2.77	0.173
0.312		1.5	1.56
0.312		0.662	0.418
0.312		1.13	0.634
0.312		1.43	2.28
0.312		0.926	1.79
0.317		1.03	1.51
0.322		0.317	0.624
0.322		1.07	0.115
0.326		0.576	0.245
0.326		1.28	0.149
0.326		0.466	0.134
0.326		0.888	0.298
0.331		0.739	0.154
0.341		0.629	0.283
0.35		0.725	0.115
0.35		0.461	0.144
0.35		0.106	0.341
0.35		2.71	1.13
0.355		0.59	1.06
0.355		0.283	0.797
0.355		0.096	1.06
0.36		1.65	0.672
0.36		0.37	1.16
0.36		0.197	2.04
0.365		0.0816	0.734
0.365		0.97	1.35
0.365		0.0576	0.979
0.37		0.226	0.989
0.37		0.125	1.09
0.37		0.134	1.43
0.374		0.547	0.586
0.379		3.57	0.0432
0.379		0.235	1.21
0.384		0.312	1.17
0.384		0.274	0.6
0.384		0.451	0.73
0.389		0.605	0.547
0.394		1.01	1.27
0.394		0.672	0.413
0.398		0.605	0.25
0.398		0.278	0.754
0.403		0.734	0.202
0.408		1.08	0.35
0.408		0.576	0.427
0.408		1.66	1.41
0.408		0.595	0.72
0.408		0.725	0.0576
0.413		0.101	0.547
0.413		3.4	1.27
0.413		0.394	0.96
0.413		0.202	0.571
0.413		0.13	0.384
0.418		0.202	0.485
0.418		0.221	1.39
0.418		0.264	1.56
0.418		0.211	1.01
0.418		0.341	1.32
0.427		0.048	1.06
0.432		0.888	1.27
0.432		0.552	0.667
0.437		0.35	1.41
0.446		1.6	0.946
0.451		0.96	1.61
0.461		0.432	0.475
0.461		0.859	0.95
0.466		2.11	1.67
0.466		2.3	0.346
0.47		1.08	0.283
0.47		0.955	1.83
0.47		0.408	0.322
0.475		0.216	0.226
0.475		0.048	0.504
0.49		0.106	0.12
0.49		0.682	0.336
0.494		0.571	0.096
0.494		0.413	0.547
0.499		0.302	0.422
0.499		0.965	0.197
0.504		2.74	0.446
0.509		0.379	0.47
0.514		1.41	0.182
0.514		0.965	0.955
0.523		0.624	0.197
0.528		0.672	0.221
0.533		0.269	1.63
0.538		0.806	0.61
0.538		0.605	0.182
0.538		0.845	0.778
0.542		0.907	0.485
0.562		2.28	0.71
0.562		0.125	0.499
0.566		0.931	0.259
0.571		0.096	0.562
0.571		1.79	1.05
0.586		0.211	1.03
0.595		0.326	0.437
0.595		0.106	1.24
0.595		0.667	1.05
0.6		2.07	0.552
0.605		2.5	0.883
0.605		1.11	2.2
0.61		0.13	0.149
0.619		0.173	0.576
0.638		0.158	0.293
0.643		0.101	2.1
0.653		0.106	0.293
0.662		0.0528	1.74
0.672		0.0864	1.11
0.677		0.139	0.274
0.686		1.35	0.538
0.686		0.0768	1.19
0.691		0.0624	0.365
0.696		0.216	0.206
0.696		0.13	0.72
0.701		0.048	0.432
0.706		2.21	1.45
0.715		0.149	1.82
0.744		0.835	1.74
0.754		0.115	0.144
0.768		0.0432	0.163
0.773		1.28	0.614
0.773		1.84	0.408
0.773		1.22	2.4
0.778		0.47	1.38
0.782		0.643	1.17
0.782		0.163	4.06
0.787		0.322	2.25
0.787		2.09	2.65
0.797		0.37	1.55
0.797		0.341	1.11
0.797		2.53	1.73
0.816		0.211	1.87
0.816		0.624	1.42
0.826		1.7	1.79
0.826		0.23	0.269
0.83		1.31	0.317
0.84		1.86	0.485
0.845		2.27	0.154
0.859		2.39	1.44
0.864		1.31	0.0528
0.869		0.278	0.782
0.878		1.25	4.14
0.883		1.22	0.61
0.883		0.35	0.216
0.898		0.24	0.216
0.898		0.168	1.47
0.907		0.25	0.048
0.907		1.35	0.298
0.907		0.312	2.01
0.926		1.06	0.048
0.941		0.096
0.946		0.134
0.96		0.466
0.96		0.269
0.974		0.048
0.984		1.3
1.01		0.048
1.01		0.274
1.03		0.259
1.04		0.211
1.04		1.12
1.05		0.0432
1.06		4.44
1.07		0.0432
1.07		0.221
1.07		0.658
1.08		0.0672
1.08		0.25
1.09		1.23
1.1		0.715
1.11		1
1.12		1.11
1.12		0.677
1.14		1.01
1.17		0.758
1.17		1.47
1.18		1
1.2		1.15
1.2		1.29
1.21		1.6
1.21		0.528
1.21		0.605
1.23		0.85
1.24		0.274
1.24		1.44
1.24		1.1
1.27		1.03
1.3		0.259
1.3		0.528
1.32		1.42
1.33		0.682
1.34		0.35
1.35		0.178
1.36		0.557
1.37		0.144
1.38		0.269
1.4		0.096
1.4		0.35
1.4		0.312
1.4		0.182
1.43		0.134
1.44		0.883
1.44		0.326
1.44		0.139
1.45		0.274
1.48		0.682
1.53		0.298
1.56		0.202
1.58		0.202
1.59		0.35
1.6		0.187
1.62		1.8
1.63		2.87
1.64		0.0816
1.68		0.614
1.69		3.78
1.71		0.139
1.74		0.0432
1.74		0.427
1.74		0.101
1.74
1.8
1.82
1.85
1.86
1.91
1.92
1.93
2.01
2.02
2.05
2.08
2.11
2.12
2.16
2.19
2.21
2.22
2.29
2.32
2.35
2.37
2.41
2.41
2.54
2.59
2.64
2.69
2.72
2.79
2.83
2.86
2.88
2.91
2.98
3.1
3.32
3.58
4.5
5.54
6.25
