# Supplementary material for: Spatiotemporal recruitment of the ubiquitin-specific protease USP8 directs endosome maturation
Source: eLife journal article supplement (doi:10.7554/elife.96353), 2024-04-16
Supplement: fig4-data7 [file fig. 4G.xlsx]

## Sheet: wt
Distance (μm)	Fluorescence intensity
0	8.6667
0.1807	8.0037
0.3613	9.3185
0.542	8.35
0.7227	8.9852
0.9033	9.6481
1.084	13.2109
1.2647	14.6147
1.4453	12.4372
1.626	10.7502
1.8067	11.9258
1.9873	10.7483
2.168	5.6896
2.3487	6.8794
2.5293	10.0736
2.71	11.8608
2.8907	11.0891
3.0713	13.1125
3.252	14.5331
3.4327	16.1571
3.6133	14.556
3.794	15.5108
3.9747	14.4966
4.1553	15.7866
4.336	14.8448
4.5167	16.6753
4.6973	27.2633
4.878	37.7803
5.0587	39.052
5.2393	40.9567
5.42	58.5489
5.6007	51.7949
5.7813	39.8041
5.962	45.8298
6.1427	36.3162
6.3233	25.3465
6.504	35.5941
6.6847	51.9008
6.8653	40.8779
7.046	25.2563
7.2267	19.9271
7.4073	20.3624
7.588	19.3896
7.7687	18.7465
7.9493	14.3879
8.13	12.5003
8.3107	11.3414
8.4913	11
8.672	9.0458
8.8527	10.7575
9.0333	10.4639
9.214	10.7161
9.3947	9.5789
9.5753	12.0549
9.756	12.1676
9.9367	10.9728
10.1173	11.355

## Sheet: rabx-5(null)
Distance (μm)	Fluorescence intensity
0	17.6667
0.1807	15.0148
0.3613	15
0.542	19.9165
0.7227	27.1701
0.9033	30.5739
1.084	28.4113
1.2647	22.2468
1.4453	17.2227
1.626	16.0501
1.8067	16.3148
1.9873	17.898
2.168	17.3779
2.3487	18.5702
2.5293	19.5887
2.71	18.4447
2.8907	18.0297
3.0713	16.491
3.252	15.4335
3.4327	15.3333
3.6133	15.3333
3.794	13.8615
3.9747	14.8367
4.1553	17.9066
4.336	20.0662
4.5167	19.4725
4.6973	19.9035
4.878	20.2832
5.0587	22.0216
5.2393	22.0538
5.42	19.501
5.6007	21.7581
5.7813	20.9635
5.962	20.9388
6.1427	22.081
6.3233	21.5282
6.504	21.3333
6.6847	19.4806
6.8653	16.8974
7.046	15.0285
7.2267	13.6302
7.4073	15.9059
7.588	18.9653
7.7687	18.906
7.9493	17.6599
8.13	19.332
8.3107	20.7439
8.4913	17.5542
8.672	13.4021
8.8527	10.6364
9.0333	8.7972
9.214	8.3333
9.3947	10.2281
9.5753	13.115
9.756	13.0674
9.9367	10.3538
10.1173	10.0216
