# Supplementary material for: Spatiotemporal recruitment of the ubiquitin-specific protease USP8 directs endosome maturation
Source: eLife journal article supplement (doi:10.7554/elife.96353), 2024-04-16
Supplement: fig5-data1 [file elife-96353-fig5-data1-v1.zip]

## Sheet: volume of 2xFYVE
wt	usp-50(xd413)	rabx-5(K323R)	usp-50(xd413); rabx-5(K323R)
0.0432	0.0432	0.0432	1.29
0.0432	0.0432	0.0432	2.02
0.0432	0.0432	0.0432	0.74
0.048	0.0432	0.0432	0.676
0.048	0.048	0.0432	2
0.048	0.048	0.0432	2.7
0.048	0.048	0.048	0.299
0.048	0.0528	0.048	2.28
0.0528	0.0528	0.048	0.54
0.0528	0.0528	0.048	1.84
0.0528	0.0528	0.048	0.0711
0.0576	0.0576	0.048	0.604
0.0576	0.0576	0.048	1.42
0.0576	0.0576	0.048	0.42
0.0576	0.0576	0.048	0.206
0.0576	0.0576	0.0528	0.142
0.0576	0.0576	0.0528	1.49
0.0624	0.0576	0.0528	0.206
0.0624	0.0624	0.0528	0.469
0.0624	0.0624	0.0528	0.384
0.0624	0.0624	0.0528	0.107
0.0672	0.072	0.0576	0.37
0.0672	0.072	0.0576	1.29
0.0672	0.0816	0.0576	0.156
0.0672	0.096	0.0576	0.519
0.072	0.096	0.0576	2.95
0.072	0.101	0.0624	0.334
0.072	0.11	0.0672	0.37
0.072	0.115	0.0672	0.583
0.0768	0.115	0.0672	0.825
0.0768	0.115	0.0672	0.434
0.0768	0.115	0.0672	0.476
0.0768	0.125	0.0672	0.427
0.0816	0.125	0.0672	0.0711
0.0816	0.139	0.0672	0.405
0.0816	0.158	0.0672	0.114
0.0816	0.178	0.0672	1
0.0816	0.178	0.0672	0.434
0.0864	0.182	0.0672	2.65
0.0864	0.192	0.072	0.327
0.0912	0.202	0.072	0.846
0.0912	0.216	0.0768	0.711
0.0912	0.221	0.0768	2.47
0.0912	0.264	0.0768	0.889
0.0912	0.322	0.0816	1.41
0.096	0.331	0.0864	2.08
0.096	0.365	0.0864	0.242
0.101	0.461	0.0912	0.896
0.101	0.461	0.0912	2.57
0.106	0.523	0.0912	0.0853
0.106	0.523	0.096	0.22
0.106	0.533	0.096	0.469
0.106	0.533	0.096	0.0711
0.106	0.581	0.101	0.128
0.106	0.619	0.106	0.0782
0.11	0.634	0.106	0.668
0.11	0.643	0.106	0.704
0.11	0.754	0.11	2.2
0.115	0.763	0.11	0.491
0.12	0.768	0.11	0.135
0.12	0.773	0.11	3.09
0.12	0.792	0.115	0.0853
0.12	0.792	0.115	0.242
0.12	0.802	0.115	0.121
0.12	0.811	0.115	3
0.125	0.83	0.115	3.32
0.125	0.83	0.115	0.54
0.13	0.869	0.115	0.156
0.13	0.883	0.12	1
0.13	0.926	0.12	1.76
0.13	0.95	0.12	0.377
0.13	0.97	0.12	0.476
0.134	0.974	0.125	0.306
0.134	0.998	0.134	0.0782
0.134	1	0.139	0.0924
0.134	1.01	0.139	0.59
0.134	1.01	0.139	0.064
0.139	1.04	0.139	0.476
0.139	1.19	0.139	1.58
0.139	1.21	0.139	1.79
0.144	1.21	0.139	1
0.144	1.27	0.144	2.53
0.149	1.28	0.144	0.96
0.149	1.29	0.144	0.185
0.149	1.34	0.144	0.107
0.154	1.36	0.144	0.064
0.154	1.37	0.144	0.064
0.154	1.49	0.158	0.206
0.154	1.49	0.158	0.932
0.154	1.53	0.158	0.064
0.158	1.58	0.163	1.55
0.158	1.6	0.163	1.09
0.163	1.61	0.163	0.256
0.168	1.66	0.168	0.434
0.168	1.82	0.168	3.16
0.173	1.93	0.168	0.356
0.173	2.06	0.173	0.0782
0.173	2.1	0.173	1.21
0.178	2.16	0.173	3.78
0.178	2.22	0.173	0.0498
0.178	2.25	0.178	1.5
0.178	2.25	0.182	1.14
0.182	2.31	0.187	0.128
0.182	2.32	0.187	0.626
0.187	2.37	0.187	0.0853
0.192	2.43	0.197	0.576
0.192	2.48	0.197	0.213
0.192	2.52	0.197	0.526
0.192	2.64	0.197	0.0782
0.197	2.8	0.197	0.0853
0.197	2.85	0.197	0.597
0.197	2.86	0.197	0.249
0.197	2.93	0.202	0.171
0.197	3.03	0.202	0.107
0.197	3.08	0.202	0.0782
0.202	3.11	0.206	0.135
0.202	3.28	0.206	0.704
0.202	3.36	0.206	0.334
0.202	3.36	0.206	0.0569
0.206	3.4	0.206	2.07
0.206	3.42	0.211	0.612
0.211	3.44	0.211	0.533
0.211	3.55	0.216	0.412
0.211	3.6	0.216	0.0711
0.216	3.61	0.216	0.37
0.216	3.69	0.226	0.299
0.216	3.71	0.226	0.718
0.221	3.87	0.226	1.64
0.221	4.05	0.23	0.242
0.221	4.15	0.235	0.171
0.221	4.19	0.235	2.85
0.226	4.29	0.235	2.7
0.226	4.32	0.235	1.4
0.226	4.38	0.24	1.34
0.226	4.44	0.24	0.0711
0.23	4.46	0.245	0.932
0.23	4.54	0.245	0.0569
0.23	4.55	0.245	0.818
0.235	4.59	0.245	0.228
0.235	4.61	0.245	2.67
0.235	4.63	0.245	0.313
0.235	4.63	0.245	0.725
0.24	4.81	0.245	0.235
0.24	4.92	0.245	0.142
0.245	5.25	0.245	0.107
0.245	5.35	0.245	0.142
0.25	5.35	0.25	0.811
0.254	5.43	0.254	1.66
0.254	5.56	0.254	0.469
0.254	5.6	0.274	0.996
0.254	5.62	0.274	0.0498
0.259	6.22	0.283	0.149
0.259	6.39	0.283	1.05
0.259	6.61	0.288	0.27
0.264	6.67	0.288	1.52
0.269	6.84	0.293	1.28
0.269	6.95	0.293	2.5
0.269	7.07	0.293	0.327
0.269	8.49	0.307	0.121
0.269	8.6	0.307	0.135
0.274	8.63	0.312	0.0498
0.274	8.79	0.317	0.0569
0.274	8.83	0.322	3.81
0.278	9.33	0.326	0.0782
0.278	10.23	0.326	2.01
0.278	11.59	0.326	0.156
0.278	11.78	0.336	0.512
0.278	12.27	0.35	1.45
0.283	15.54	0.35	0.0569
0.283	16.61	0.35	0.292
0.288	19.33	0.35	0.0924
0.288	20.66	0.37	2.47
0.293	23.39	0.37	0.0924
0.293		0.37	0.107
0.293		0.37	0.384
0.298		0.374	0.064
0.298		0.379	0.292
0.298		0.384	1.3
0.298		0.389	0.164
0.302		0.389	0.0782
0.302		0.398	0.341
0.307		0.398	0.341
0.307		0.398	1.16
0.312		0.408	0.192
0.312		0.408	0.882
0.312		0.418	1.53
0.312		0.418	0.682
0.312		0.418	2.35
0.317		0.422	0.466
0.322		0.427	1.16
0.322		0.427	2.07
0.326		0.432	0.13
0.326		0.432	0.168
0.326		0.437	0.797
0.326		0.446	2.42
0.331		0.446	0.211
0.341		0.446	0.427
0.35		0.446	6.47
0.35		0.451	0.0432
0.35		0.456	2.84
0.35		0.456	0.293
0.355		0.466	0.072
0.355		0.466	1.12
0.355		0.466	0.134
0.36		0.466	3.15
0.36		0.48	0.922
0.36		0.49	0.394
0.365		0.499	0.106
0.365		0.499	2.98
0.365		0.504	0.427
0.37		0.509	0.0576
0.37		0.514	0.427
0.37		0.514	0.355
0.374		0.518	0.101
0.379		0.528	0.917
0.379		0.528	0.0432
0.384		0.528	4.27
0.384		0.533	0.278
0.384		0.538	0.35
0.389		0.547	0.245
0.394		0.547	0.624
0.394		0.547	0.374
0.398		0.547	0.168
0.398		0.547	0.072
0.403		0.552	2.36
0.408		0.557	1.06
0.408		0.562	2.05
0.408		0.571	2.99
0.408		0.576	4.15
0.408		0.586	0.139
0.413		0.586	0.106
0.413		0.595	0.408
0.413		0.6	0.365
0.413		0.61	0.47
0.413		0.629	0.206
0.418		0.629	0.619
0.418		0.643	0.571
0.418		0.658	1.05
0.418		0.658	3
0.418		0.658	0.0528
0.427		0.658	0.926
0.432		0.667	0.158
0.432		0.667	1.82
0.437		0.667	0.989
0.446		0.677	0.317
0.451		0.677	3.17
0.461		0.677	0.178
0.461		0.682	0.6
0.466		0.682	0.466
0.466		0.682	0.648
0.47		0.686	1.19
0.47		0.691	0.0672
0.47		0.691	1.72
0.475		0.691	0.0432
0.475		0.696	0.331
0.49		0.701	0.048
0.49		0.706	0.0528
0.494		0.715	0.0432
0.494		0.715	0.0432
0.499		0.72	0.0864
0.499		0.739	0.0816
0.504		0.754	0.0576
0.509		0.768	0.0528
0.514		0.768	0.0432
0.514		0.768	0.048
0.523		0.787	1.05
0.528		0.802	1.42
0.533		0.802	0.835
0.538		0.806	2.97
0.538		0.806	0.72
0.538		0.816	0.168
0.542		0.816	0.605
0.562		0.816	10.74
0.562		0.816	0.0576
0.566		0.816	0.048
0.571		0.83	1.53
0.571		0.835	0.835
0.586		0.835	1.72
0.595		0.835	0.149
0.595		0.835	4.1
0.595		0.859	0.97
0.6		0.864	0.125
0.605		0.898	1.95
0.605		0.907	1.08
0.61		0.907	0.0576
0.619		0.946	6.81
0.638		0.946	0.0576
0.643		0.96	0.245
0.653		0.994	0.0624
0.662		1	0.0432
0.672		1	4.37
0.677		1.01	0.0432
0.686		1.01	0.115
0.686		1.02	0.134
0.691		1.02	0.048
0.696		1.02	0.101
0.696		1.04	0.0432
0.701		1.07	0.101
0.706		1.07	0.0528
0.715		1.08	0.0864
0.744		1.09	0.0432
0.754		1.09	0.125
0.768		1.1	0.096
0.773		1.1	0.0624
0.773		1.1	0.11
0.773		1.1	3.96
0.778		1.11	3.17
0.782		1.12	1.1
0.782		1.12	1.59
0.787		1.15	0.466
0.787		1.15	0.048
0.797		1.16	0.158
0.797		1.18	0.0624
0.797		1.18	0.245
0.816		1.18	1.51
0.816		1.19	1.12
0.826		1.19	3.03
0.826		1.19	0.686
0.83		1.2	2.11
0.84		1.2	2.2
0.845		1.21	0.835
0.859		1.21	3.06
0.864		1.22	0.0528
0.869		1.22	0.0576
0.878		1.22	1.29
0.883		1.24	0.917
0.883		1.24	0.293
0.898		1.24	0.139
0.898		1.25	0.0912
0.907		1.25	7.63
0.907		1.29	0.0528
0.907		1.29	0.0528
0.926		1.31	0.298
0.941		1.31	0.072
0.946		1.35	0.0528
0.96		1.37	0.048
0.96		1.39	0.0528
0.974		1.42	1.07
0.984		1.42	1.77
1.01		1.42	0.0432
1.01		1.42	0.0528
1.03		1.43	0.0432
1.04		1.43	0.0576
1.04		1.44	0.0432
1.05		1.44	0.787
1.06		1.49	4.07
1.07		1.49	2.37
1.07		1.5	1.2
1.07		1.5	6.31
1.08		1.5	1.33
1.08		1.5	1.83
1.09		1.53	0.926
1.1		1.57	0.23
1.11		1.57	0.59
1.12		1.58	3.5
1.12		1.58	1.13
1.14		1.58	3.29
1.17		1.62	0.173
1.17		1.62	0.072
1.18		1.63	0.149
1.2		1.65	9.02
1.2		1.66	0.955
1.21		1.67	0.0528
1.21		1.72	0.0528
1.21		1.72	0.0624
1.23		1.8
1.24		1.84
1.24		1.84
1.24		1.9
1.27		1.93
1.3		1.93
1.3		1.94
1.32		1.95
1.33		1.98
1.34		1.98
1.35		2.01
1.36		2.02
1.37		2.02
1.38		2.03
1.4		2.05
1.4		2.06
1.4		2.12
1.4		2.12
1.43		2.12
1.44		2.14
1.44		2.15
1.44		2.34
1.45		2.37
1.48		2.4
1.53		2.61
1.56		2.61
1.58		2.66
1.59		2.7
1.6		2.73
1.62		2.73
1.63		2.73
1.64		2.75
1.68		2.75
1.69		2.75
1.71		2.75
1.74		2.82
1.74		2.82
1.74		2.82
1.74		2.93
1.8		2.93
1.82		2.95
1.85		3.42
1.86		3.72
1.91		3.98
1.92		4.3
1.93		4.51
2.01		4.52
2.02		4.56
2.05		4.56
2.08		5.2
2.11		1.45
2.12		0.072
2.16		0.0816
2.19		1.32
2.21		0.725
2.22		2.41
2.29		1.05
2.32		1.23
2.35		0.317
2.37		0.422
2.41		0.158
2.41		0.538
2.54		0.629
2.59		0.158
2.64		0.134
2.69		0.883
2.72		0.379
2.79		0.12
2.83		0.408
2.86		1.27
2.88		1.03
2.91		1.61
2.98		0.115
3.1		0.197
3.32
3.58
4.5
5.54
6.25

## Sheet: volume of NUC-1
wt	usp-50(xd413)	rabx-5(K323R)	usp-50(xd413); rabx-5(K323R)
0.0432	0.0048	0.041	0.0144
0.0432	0.0048	0.041	0.0192
0.0432	0.0048	0.041	0.0192
0.0432	0.0048	0.041	0.024
0.0432	0.0048	0.041	0.024
0.0432	0.0048	0.041	0.024
0.0432	0.0048	0.041	0.0288
0.0432	0.0048	0.041	0.0288
0.0432	0.0048	0.044	0.0288
0.0432	0.0048	0.044	0.0336
0.048	0.0048	0.044	0.0336
0.048	0.0048	0.044	0.0384
0.048	0.0048	0.044	0.0384
0.048	0.0048	0.048	0.041
0.048	0.0048	0.048	0.041
0.048	0.0048	0.048	0.041
0.048	0.0048	0.048	0.043
0.048	0.0048	0.048	0.043
0.048	0.0048	0.048	0.043
0.048	0.0048	0.056	0.043
0.048	0.0048	0.056	0.044
0.048	0.0048	0.056	0.044
0.048	0.0048	0.056	0.044
0.0528	0.0048	0.056	0.044
0.0528	0.0048	0.056	0.048
0.0528	0.0048	0.056	0.048
0.0528	0.0048	0.0576	0.048
0.0528	0.0048	0.0576	0.048
0.0528	0.0048	0.0576	0.048
0.0528	0.0048	0.0672	0.0528
0.0528	0.0048	0.0672	0.0528
0.0528	0.0048	0.0672	0.0528
0.0576	0.0048	0.0672	0.0528
0.0576	0.0096	0.0672	0.0576
0.0576	0.0096	0.0672	0.0576
0.0576	0.0096	0.0672	0.0576
0.0576	0.0096	0.072	0.0576
0.0576	0.0096	0.072	0.0624
0.0576	0.0096	0.072	0.0624
0.0624	0.0096	0.072	0.0624
0.0624	0.0096	0.0768	0.0624
0.0672	0.0096	0.0768	0.0672
0.0672	0.0096	0.0768	0.0672
0.0672	0.0096	0.0768	0.0672
0.0672	0.0096	0.0782	0.072
0.0672	0.0096	0.0788	0.072
0.072	0.0144	0.0788	0.072
0.072	0.0144	0.0788	0.0768
0.072	0.0144	0.0788	0.0768
0.072	0.0144	0.0816	0.0782
0.072	0.0144	0.0816	0.0782
0.0768	0.0144	0.0863	0.0788
0.0768	0.0144	0.0863	0.0788
0.0768	0.0144	0.0864	0.0816
0.0768	0.0144	0.0864	0.0816
0.0816	0.0144	0.0864	0.0816
0.0816	0.0144	0.0864	0.0863
0.0816	0.0192	0.0912	0.0863
0.0816	0.0192	0.0912	0.0863
0.0864	0.0192	0.0912	0.0863
0.0864	0.0192	0.0949	0.0863
0.0912	0.0192	0.0949	0.0863
0.0912	0.0192	0.096	0.0949
0.0912	0.024	0.096	0.0949
0.0912	0.024	0.096	0.096
0.096	0.024	0.098	0.096
0.096	0.024	0.099	0.096
0.096	0.024	0.101	0.096
0.096	0.0288	0.101	0.098
0.096	0.0288	0.104	0.101
0.096	0.0288	0.104	0.101
0.101	0.0288	0.104	0.101
0.101	0.0288	0.106	0.103
0.101	0.0336	0.106	0.104
0.106	0.0336	0.11	0.106
0.106	0.0336	0.11	0.106
0.106	0.0336	0.112	0.112
0.11	0.0336	0.112	0.112
0.11	0.0336	0.115	0.112
0.115	0.0336	0.115	0.121
0.115	0.0336	0.12	0.121
0.12	0.0336	0.121	0.121
0.12	0.0384	0.129	0.121
0.125	0.0384	0.13	0.121
0.125	0.0384	0.13	0.129
0.13	0.0384	0.134	0.129
0.13	0.0384	0.134	0.13
0.13	0.0384	0.134	0.13
0.13	0.0384	0.138	0.13
0.13	0.0432	0.139	0.13
0.13	0.048	0.139	0.134
0.134	0.048	0.139	0.134
0.134	0.048	0.139	0.137
0.134	0.048	0.141	0.137
0.134	0.048	0.141	0.138
0.134	0.048	0.141	0.138
0.134	0.0528	0.141	0.147
0.134	0.0576	0.147	0.147
0.139	0.0576	0.147	0.149
0.139	0.0576	0.149	0.149
0.139	0.0576	0.149	0.149
0.139	0.0576	0.149	0.149
0.139	0.0576	0.149	0.149
0.149	0.0624	0.149	0.149
0.149	0.0624	0.155	0.154
0.149	0.0624	0.155	0.154
0.149	0.0624	0.155	0.155
0.149	0.0624	0.158	0.155
0.149	0.0624	0.158	0.155
0.149	0.0672	0.163	0.155
0.154	0.0672	0.164	0.164
0.154	0.0672	0.164	0.164
0.158	0.0672	0.167	0.164
0.158	0.0672	0.167	0.164
0.158	0.072	0.167	0.164
0.158	0.072	0.167	0.173
0.163	0.072	0.168	0.173
0.163	0.0768	0.168	0.173
0.163	0.0768	0.168	0.173
0.163	0.0768	0.173	0.173
0.168	0.0768	0.178	0.173
0.168	0.0768	0.178	0.173
0.168	0.0768	0.181	0.173
0.168	0.0816	0.181	0.173
0.178	0.0816	0.182	0.173
0.178	0.0816	0.182	0.173
0.178	0.0864	0.188	0.173
0.178	0.0864	0.188	0.173
0.182	0.0864	0.188	0.181
0.182	0.0864	0.19	0.181
0.182	0.0912	0.19	0.181
0.182	0.0912	0.19	0.19
0.182	0.0912	0.19	0.19
0.182	0.0912	0.19	0.19
0.187	0.096	0.191	0.19
0.187	0.101	0.191	0.19
0.187	0.101	0.191	0.19
0.187	0.101	0.191	0.19
0.192	0.101	0.191	0.19
0.192	0.101	0.197	0.19
0.197	0.106	0.197	0.19
0.197	0.106	0.197	0.19
0.197	0.11	0.197	0.191
0.197	0.11	0.199	0.199
0.197	0.11	0.199	0.199
0.202	0.11	0.203	0.207
0.206	0.11	0.203	0.207
0.206	0.12	0.203	0.207
0.211	0.12	0.219	0.207
0.211	0.12	0.219	0.207
0.211	0.125	0.219	0.213
0.216	0.125	0.219	0.213
0.216	0.125	0.221	0.213
0.216	0.125	0.23	0.216
0.216	0.13	0.224	0.216
0.221	0.134	0.224	0.216
0.23	0.134	0.235	0.224
0.235	0.134	0.235	0.224
0.235	0.134	0.235	0.224
0.24	0.134	0.235	0.233
0.24	0.139	0.25	0.234
0.245	0.139	0.25	0.234
0.245	0.139	0.25	0.242
0.25	0.139	0.25	0.242
0.25	0.139	0.25	0.242
0.25	0.139	0.25	0.242
0.25	0.144	0.259	0.242
0.25	0.144	0.259	0.25
0.259	0.149	0.259	0.255
0.259	0.154	0.266	0.259
0.259	0.154	0.266	0.259
0.269	0.154	0.281	0.259
0.269	0.158	0.281	0.259
0.269	0.163	0.281	0.259
0.274	0.168	0.281	0.276
0.274	0.168	0.297	0.276
0.278	0.168	0.297	0.285
0.278	0.173	0.297	0.293
0.288	0.173	0.297	0.293
0.288	0.173	0.297	0.293
0.288	0.173	0.297	0.293
0.293	0.173	0.297	0.298
0.298	0.173	0.297	0.302
0.298	0.173	0.313	0.302
0.302	0.178	0.313	0.311
0.302	0.178	0.313	0.311
0.307	0.178	0.328	0.311
0.307	0.182	0.328	0.311
0.317	0.182	0.344	0.311
0.317	0.182	0.355	0.311
0.322	0.182	0.355	0.319
0.326	0.187	0.355	0.328
0.336	0.187	0.36	0.328
0.336	0.187	0.36	0.328
0.346	0.192	0.375	0.328
0.346	0.192	0.391	0.337
0.355	0.192	0.391	0.34
0.36	0.197	0.407	0.34
0.36	0.197	0.422	0.345
0.365	0.197	0.426	0.345
0.37	0.202	0.438	0.345
0.37	0.202	0.462	0.354
0.374	0.202	0.469	0.354
0.379	0.206	0.485	0.354
0.379	0.206	0.497	0.362
0.384	0.206	0.497	0.363
0.389	0.206	0.497	0.363
0.394	0.216	0.5	0.363
0.394	0.221	0.516	0.38
0.398	0.23	0.532	0.38
0.398	0.235	0.533	0.38
0.408	0.24	0.547	0.383
0.413	0.24	0.563	0.388
0.418	0.245	0.563	0.388
0.422	0.25	0.568	0.388
0.422	0.25	0.568	0.397
0.427	0.25	0.568	0.397
0.427	0.254	0.568	0.397
0.427	0.254	0.579	0.397
0.432	0.254	0.594	0.397
0.437	0.269	0.604	0.404
0.442	0.274	0.604	0.406
0.442	0.278	0.61	0.414
0.446	0.278	0.625	0.414
0.446	0.278	0.625	0.423
0.456	0.283	0.64	0.423
0.456	0.283	0.64	0.432
0.461	0.298	0.657	0.447
0.461	0.298	0.657	0.449
0.461	0.307	0.675	0.457
0.466	0.307	0.675	0.457
0.47	0.312	0.675	0.466
0.475	0.322	0.675	0.466
0.475	0.322	0.704	0.475
0.48	0.331	0.711	0.483
0.48	0.331	0.711	0.483
0.504	0.331	0.719	0.489
0.504	0.336	0.719	0.501
0.518	0.341	0.719	0.501
0.518	0.35	0.735	0.501
0.528	0.355	0.735	0.501
0.528	0.355	0.746	0.501
0.533	0.355	0.766	0.501
0.538	0.374	0.782	0.509
0.547	0.379	0.782	0.518
0.552	0.389	0.797	0.518
0.557	0.394	0.797	0.518
0.557	0.398	0.813	0.527
0.576	0.408	0.817	0.544
0.581	0.408	0.817	0.552
0.586	0.413	0.829	0.552
0.6	0.418	0.853	0.552
0.6	0.422	0.876	0.561
0.619	0.451	0.888	0.57
0.619	0.49	0.888	0.57
0.619	0.499	0.891	0.578
0.629	0.509	0.907	0.587
0.634	0.542	0.924	0.587
0.634	0.547	0.924	0.587
0.638	0.552	0.938	0.595
0.638	0.557	0.959	0.604
0.643	0.562	0.959	0.617
0.648	0.566	0.97	0.63
0.658	0.571	0.985	0.639
0.662	0.571	1	0.639
0.662	0.571	1	0.656
0.662	0.595	1.02	0.656
0.701	0.605	1.02	0.673
0.706	0.605	1.03	0.673
0.739	0.614	1.03	0.681
0.739	0.619	1.05	0.682
0.739	0.658	1.05	0.682
0.744	0.667	1.07	0.691
0.749	0.691	1.08	0.691
0.754	0.715	1.09	0.708
0.758	0.72	1.1	0.716
0.773	0.734	1.11	0.725
0.773	0.734	1.13	0.734
0.806	0.744	1.14	0.742
0.811	0.749	1.14	0.744
0.811	0.754	1.14	0.76
0.816	0.758	1.16	0.76
0.83	0.768	1.19	0.766
0.835	0.773	1.21	0.777
0.854	0.806	1.21	0.785
0.859	0.84	1.24	0.794
0.883	0.859	1.25	0.794
0.883	0.864	1.25	0.794
0.898	0.878	1.3	0.811
0.902	0.888	1.31	0.811
0.902	0.902	1.33	0.811
0.907	0.902	1.35	0.82
0.907	0.946	1.36	0.829
0.907	0.946	1.38	0.863
0.917	0.998	1.39	0.863
0.931	1.05	1.42	0.889
0.96	1.08	1.44	0.893
0.97	1.09	1.46	0.898
0.979	1.1	1.47	0.915
0.979	1.14	1.49	0.915
1.01	1.14	1.53	0.932
1.05	1.18	1.53	0.932
1.07	1.18	1.55	0.936
1.08	1.27	1.56	0.941
1.09	1.3	1.6	0.949
1.09	1.32	1.67	0.957
1.11	1.33	1.67	0.978
1.14	1.35	1.72	0.984
1.15	1.39	1.74	1
1.16	1.54	1.78	1
1.2	1.56	1.81	1.02
1.23	1.58	1.85	1.04
1.27	1.83	1.85	1.04
1.3	1.84	1.88	1.07
1.31	1.86	1.94	1.09
1.32	1.92	1.95	1.14
1.33	1.98	1.99	1.14
1.33	2.05	2.03	1.15
1.34	2.07	2.08	1.16
1.4	2.08	2.11	1.19
1.4	2.15	2.13	1.21
1.41	2.48	2.13	1.23
1.43	2.5	2.14	1.23
1.49	2.64	2.17	1.23
1.56	2.8	2.2	1.24
1.64	3.93	2.24	1.26
1.66	3.96	2.27	1.29
1.66	17.33	2.31	1.29
1.66		2.33	1.31
1.67		2.36	1.33
1.74		2.38	1.34
1.75		2.53	1.38
1.79		2.56	1.42
1.8		2.66	1.42
1.82		2.72	1.47
1.96		2.84	1.48
1.97		2.86	1.48
1.98		2.88	1.52
2		2.89	1.54
2.01		2.95	1.55
2.02		3.03	1.55
2.04		3.09	1.57
2.08		3.23	1.58
2.1		3.24	1.62
2.18		3.27	1.68
2.23		3.33	1.69
2.26		3.34	1.72
2.28		3.67	1.73
2.46		3.71	1.74
2.46		3.73	1.86
2.49		3.73	1.86
2.5		4.01	1.92
2.52		4.14	1.92
2.64		4.22	2.01
2.76		4.25	2.02
2.77		4.35	2.07
2.87		4.43	2.28
2.87		4.93	2.34
2.97		5	2.34
3.02		5.18	2.49
3.15		5.46	2.49
3.26		5.46	2.63
3.32		5.65	2.65
3.49		6.22	2.74
3.55		6.4	2.74
3.76		6.96	2.78
3.77		7.04	2.8
3.85		7.58	2.8
4		7.91	2.83
4.15		8.16	2.91
4.47		9.1	3.16
4.8		9.57	3.38
4.87		9.98	3.43
4.88		10.45	3.48
4.98		10.7	3.71
4.99		12.13	3.78
5.2		12.51	3.85
5.27		13.36	4.01
5.32		13.36	4.12
5.65		15.7	4.32
5.73		27.82	4.85
6.32		28.88	5.21
6.37		31.3	5.35
6.44		18.37	6.01
6.45		5.65	7.33
7.07		5.92	10.05
7.13		31.21	12.17
7.3			18.78
7.42			21.37
7.58
7.62
8.92
9.42
9.42
10.72
10.76
11.01
12.11
12.61
13.7
14.43
14.81
14.88
15.62
16.35
18.59
20.23
20.93
33.12
			8.11
			8.3
			8.72
			9.46
			10.05
			10.56
			10.74
			11.24
			12.01
			12.17
			13.02
			13.55
			18.78
			18.9
			19.48
			21.37
			22.29
			26.46
			29.11
			31.21
