# Supplementary material for: Spatiotemporal recruitment of the ubiquitin-specific protease USP8 directs endosome maturation
Source: eLife journal article supplement (doi:10.7554/elife.96353), 2024-04-16
Supplement: fig5-data1 [file fig. 5I.xlsx]

## Sheet: fig. 5I
RABX-5::GFP KI wt			RABX-5::GFP KI usp-50(xd413); hyp USP-50			RABX-5::GFP KI usp-50(xd413);hyp USP-50(C492A)			RABX-5(K88R)::GFP KI wt			RABX-5(K88R)::GFP KI usp-50(xd413)			RABX-5(K323R)::GFP KI wt			RABX-5(K323R)::GFP KI usp-50(xd413)
Distance (μm)	Fluorescence intensity		Distance (μm)	Fluorescence intensity		Distance (μm)	Fluorescence intensity		Distance (μm)	Fluorescence intensity		Distance (μm)	Fluorescence intensity		Distance (μm)	Fluorescence intensity		Distance (μm)	Fluorescence intensity
0	19.2417		0	3.8802		0	0.6784		0	11.2257		0	12.9298		0	9.0844		0	9.9724
0.1795	18.1973		0.1795	7.9427		0.1795	0.4951		0.1795	10.9316		0.1795	17.8168		0.1795	11.5464		0.1795	9.1259
0.3589	12.8716		0.3589	9.3881		0.3589	0.4345		0.3589	12.8616		0.3589	5.2767		0.3589	17.6427		0.3589	15.5789
0.5384	10.2863		0.5384	24.8692		0.5384	0.6372		0.5384	11.2766		0.5384	11.9618		0.5384	10.2897		0.5384	12.6639
0.7179	8.3761		0.7179	42.574		0.7179	0.5677		0.7179	10.8621		0.7179	12.0243		0.7179	13.8098		0.7179	7.3654
0.8974	5.554		0.8974	59.1664		0.8974	0.6909		0.8974	9.6635		0.8974	4.703		0.8974	19.0783		0.8974	9.0822
1.0768	11.1221		1.0768	38.8181		1.0768	1.4577		1.0768	10.1744		1.0768	1.9478		1.0768	20.0815		1.0768	10.0122
1.2563	8.7451		1.2563	20.9561		1.2563	7.1298		1.2563	10.207		1.2563	17.5161		1.2563	9.59		1.2563	8.8115
1.4358	8.2033		1.4358	8.8763		1.4358	16.5422		1.4358	10.1537		1.4358	61.5822		1.4358	12.9694		1.4358	9.8074
1.6152	5.4025		1.6152	7.5341		1.6152	7.4477		1.6152	11.5547		1.6152	67.7615		1.6152	17.3569		1.6152	10.2659
1.7947	5.6487		1.7947	9.2458		1.7947	3.4867		1.7947	9.7273		1.7947	70.2348		1.7947	11.6379		1.7947	17.2037
1.9742	10.5593		1.9742	3.6815		1.9742	7.4012		1.9742	11.6322		1.9742	42.2359		1.9742	17.5245		1.9742	15.5466
2.1536	6.2462		2.1536	2.4641		2.1536	1.324		2.1536	11.334		2.1536	15.7183		2.1536	18.304		2.1536	13.768
2.3331	9.7346		2.3331	1.4621		2.3331	1.3208		2.3331	7.5203		2.3331	10.6163		2.3331	11.3107		2.3331	9.7701
2.5126	5.738		2.5126	1.2691		2.5126	1.7434		2.5126	10.5317		2.5126	6.563		2.5126	14.7366		2.5126	7.1304
2.6921	6.8807		2.6921	11.2459		2.6921	1.3582		2.6921	9.5353		2.6921	3.4901		2.6921	22.4117		2.6921	5.874
2.8715	8.7541		2.8715	46.545		2.8715	15.926		2.8715	10.0971		2.8715	5.691		2.8715	13.8655		2.8715	5.3946
3.051	12.6638		3.051	71.9818		3.051	65.8912		3.051	11.1809		3.051	23.8692		3.051	15.7661		3.051	10.2271
3.2305	11.6863		3.2305	75.2135		3.2305	85		3.2305	8.7284		3.2305	32.4477		3.2305	10.4429		3.2305	8.2243
3.4099	15.47		3.4099	35.2869		3.4099	85		3.4099	14.6609		3.4099	29.0422		3.4099	14.4747		3.4099	20.0865
3.5894	11.0755		3.5894	14.9126		3.5894	76.692		3.5894	18.4393		3.5894	16.7089		3.5894	16.4736		3.5894	15.4093
3.7689	8.8082		3.7689	44.5844		3.7689	38.4604		3.7689	15.2565		3.7689	16.6898		3.7689	8.2934		3.7689	9.9548
3.9483	7.6337		3.9483	53.3574		3.9483	27.1275		3.9483	10.2268		3.9483	2.6236		3.9483	9.7239		3.9483	14.2124
4.1278	6.7074		4.1278	8.511		4.1278	44.9251		4.1278	5.9014		4.1278	5.1757		4.1278	11.5833		4.1278	4.6637
4.3073	4.253		4.3073	4.7319		4.3073	22.9048		4.3073	11.3634		4.3073	15.4958		4.3073	9.9487		4.3073	6.395
4.4868	11.3208		4.4868	4.7229		4.4868	0.8929		4.4868	15.8682		4.4868	12.9307		4.4868	12.055		4.4868	7.2402
4.6662	16.5879		4.6662	1.5611		4.6662	0.6422		4.6662	8.0459		4.6662	1.4835		4.6662	13.7767		4.6662	3.7172
4.8457	10.4565		4.8457	3.1633		4.8457	1.0977		4.8457	9.8965		4.8457	4.4739		4.8457	8.7572		4.8457	6.0455
5.0252	9.4601		5.0252	2.3886		5.0252	0.4789		5.0252	17.5656		5.0252	4.9391		5.0252	13.5654		5.0252	1.6505
5.2046	10.3841		5.2046	2.7525		5.2046	1.2215		5.2046	16.1611		5.2046	0.6667		5.2046	14.3378		5.2046	9.7293
5.3841	9.7598		5.3841	5.9769		5.3841	0.5446		5.3841	14.9248		5.3841	0.8049		5.3841	6.7522		5.3841	9.6384
5.5636	11.2928		5.5636	21.3414		5.5636	0.6224		5.5636	9.0987		5.5636	2.7344		5.5636	13.691		5.5636	3.8103
5.743	13.8625		5.743	34.0961		5.743	0.6245		5.743	9.118		5.743	11.8089		5.743	18.6163		5.743	4.2707
5.9225	14.9915		5.9225	20.2646		5.9225	1.0093		5.9225	12.0404		5.9225	31.0816		5.9225	19.3666		5.9225	5.9289
6.102	13.3423		6.102	53.2599		6.102	0.9769		6.102	9.0473		6.102	68.3656		6.102	17.4026		6.102	7.8756
6.2815	10.5772		6.2815	71.7481		6.2815	2.3335		6.2815	6.7698		6.2815	75.5253		6.2815	9.5701		6.2815	11.8619
6.4609	10.41		6.4609	75.0169		6.4609	1.703		6.4609	9.5531		6.4609	73.8424		6.4609	10.6972		6.4609	17.0981
6.6404	8.1083		6.6404	66.0263		6.6404	1.6481		6.6404	13.9563		6.6404	8.9204		6.6404	9.8479		6.6404	16.2695
6.8199	16.3098		6.8199	61.2629		6.8199	1.6104		6.8199	21.1639		6.8199	9.2546		6.8199	13.9246		6.8199	14.3194
6.9993	14.9035		6.9993	20.6483		6.9993	7.1519		6.9993	16.5743		6.9993	3.7906		6.9993	16.6728		6.9993	24.476
7.1788	8.3622		7.1788	2.9016		7.1788	11.2489		7.1788	11.0359		7.1788	5.272		7.1788	4.7784		7.1788	11.8338
7.3583	7.0922		7.3583	12.5703		7.3583	61.7006		7.3583	17.9277		7.3583	5.4939		7.3583	7.2863		7.3583	6.8546
7.5377	10.9611		7.5377	10.5713		7.5377	85		7.5377	20.6999		7.5377	3.1457		7.5377	14.3739		7.5377	4.0115
7.7172	5.8353		7.7172	3.2068		7.7172	85		7.7172	10.9733		7.7172	6.5881		7.7172	16.6978		7.7172	4.7737
7.8967	7.4293		7.8967	1.6425		7.8967	83.0462		7.8967	6.7702		7.8967	45.5846		7.8967	13.3156		7.8967	9.5529
8.0762	8.4181		8.0762	5.046		8.0762	42.7852		8.0762	12.4029		8.0762	24.2917		8.0762	13.6867		8.0762	8.8763
8.2556	11.4982		8.2556	4.7555		8.2556	1.2477		8.2556	17.1228		8.2556	20.3435		8.2556	9.6887		8.2556	19.5255
8.4351	8.6077		8.4351	6.9482		8.4351	1.5928		8.4351	9.2629		8.4351	52.0683		8.4351	16.4116		8.4351	25.2223
8.6146	6.08		8.6146	1.4678		8.6146	1.2727		8.6146	7.0515		8.6146	13.7076		8.6146	15.9052		8.6146	15.7704
8.794	6.1496		8.794	1.4359		8.794	2.8369		8.794	9.2419		8.794	25.0624		8.794	9.6745		8.794	17.4889
8.9735	8.4524		8.9735	1.6369		8.9735	3.2724		8.9735	14.9757		8.9735	66.5304		8.9735	10.7914		8.9735	5.8964
9.153	15.5144		9.153	2.1727		9.153	1.2378		9.153	9.1681		9.153	82.4678		9.153	9.9312		9.153	10.9668
9.3324	10.9842		9.3324	2.3597		9.3324	1.8283		9.3324	10.2409		9.3324	76.2121		9.3324	11.7026		9.3324	12.6301
9.5119	12.3805		9.5119	4.4555		9.5119	2.7335		9.5119	13.9667		9.5119	8.9018		9.5119	14.4416		9.5119	6.3073
9.6914	12.8686		9.6914	1.372		9.6914	2.3025		9.6914	21.8558		9.6914	6.1478		9.6914	17.7511		9.6914	2.7894
9.8709	14.1574		9.8709	1.4661		9.8709	1.121		9.8709	24.7303		9.8709	1.8717		9.8709	12.8841		9.8709	6.4714
10.0503	7.2627		10.0503	1.2047		10.0503	3.6813		10.0503	11.6269		10.0503	2.8289		10.0503	16.0697		10.0503	10.3276
