# Supplementary material for: Spatiotemporal recruitment of the ubiquitin-specific protease USP8 directs endosome maturation
Source: eLife journal article supplement (doi:10.7554/elife.96353), 2024-04-16

Figure 5-S1E

Rabex5-mEGFP<sup>+/+</sup>  
WT    USP8-KO

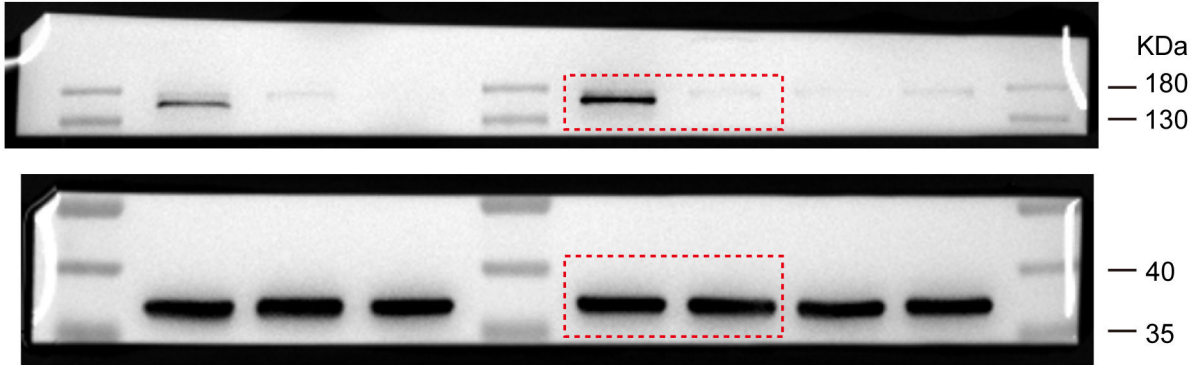

Supplement: fig5-figsupp1-data2 [file elife-96353-fig5-figsupp1-data2-v1.pdf]
