# Supplementary material for: Spatiotemporal recruitment of the ubiquitin-specific protease USP8 directs endosome maturation
Source: eLife journal article supplement (doi:10.7554/elife.96353), 2024-04-16
Supplement: fig5-figsupp1-data3 [file elife-96353-fig5-figsupp1-data3-v1.zip]

## Sheet: No. of spots
WT	USP8-KO
0.103843	0.0561512
0.132761	0.0644699
0.0683523	0.0790276
0.0565221	0.0467927
0.00525787	0.0405537
0.0683523	0.0707089
0.0276038	0.0707089
0.0039434	0.0374341
0.081497	0.0592707
0.0749246	0.083187
0.081497	0.0655098
0.105157	0.044713
0.116988	0.0353545
0.0906982	0.0540715
0.00525787	0.0301553
0.0801825	0.0634301
0.078868	0.0727886
0.0657234	0.0613504
0.11173	0.0478325
0.0867548	0.0717488
0.0525787	0.0655098
0.116988	0.0727886
0.0762391	0.0592707
0.0709812	0.0519919
0.0552076	0
0.0644089	0.0114382
0.081497	0.0603106
0.0184025	0.0374341
0.0880693	0.0426333
0.0906982	0.0571911
0.0893838	0.0488724
0.0512642	0.0904658
