# Supplementary material for: Spatiotemporal recruitment of the ubiquitin-specific protease USP8 directs endosome maturation
Source: eLife journal article supplement (doi:10.7554/elife.96353), 2024-04-16
Supplement: fig5-figsupp2-data7 [file elife-96353-fig5-figsupp2-data7-v1.zip]

## Sheet: volume of RAB-5
wt	usp-50(xd413)
1.07	2.06
0.547	2.13
0.346	0.346
0.125	0.523
0.389	0.451
0.427	1.29
0.557	0.269
0.139	1.94
0.197	0.605
0.269	2.97
0.101	1.01
0.154	0.739
0.595	0.12
0.403	1.12
0.187	1.27
0.211	2.64
0.576	0.202
0.0576	1.33
1.48	3.65
0.23	0.173
0.403	0.283
0.979	1.15
0.202	1.7
0.36	0.989
0.139	0.514
0.13	0.13
1.01	1.25
0.115	0.0864
0.12	0.6
0.226	0.0576
0.168	1.32
0.048	1.49
0.134	0.667
0.274	2.15
0.192	0.365
0.322	0.11
0.0624	0.0432
0.182	0.106
0.072	0.379
0.0768	1.38
0.0816	0.216
0.187	0.278
0.096	0.24
0.0672	3.31
0.0768	0.48
0.0432	0.264
0.11	5.4
1.08	1.02
1.56	0.168
0.71	0.24
0.226	0.202
0.326	3.65
0.499	2.97
0.384	1.34
0.226	0.763
1.17	1.15
0.221	0.514
0.149	0.0624
0.37	2.19
0.139	1.08
0.739	2.47
0.158	4.28
0.254	2.12
0.11	0.715
0.346	0.869
0.245	0.643
0.437	0.173
0.178	2.26
0.384	0.744
0.538	0.326
0.115	0.984
0.504	0.0432
0.778	0.12
0.36	0.322
0.374	0.398
0.35	0.571
0.0432	0.754
0.072	1.56
0.048	0.499
0.226	0.202
0.134	0.418
0.845	0.888
0.0432	0.0528
0.902	8.08
0.278	0.106
0.614	0.048
0.0816	0.542
0.187	1.17
0.245	0.629
0.206	0.878
0.12	0.552
0.072	1.92
0.11	0.403
0.048	0.187
0.254	0.71
0.182	0.36
0.0816	0.869
0.0768	0.998
0.264	2.35
0.336	0.403
0.0624	2.81
0.134	0.389
0.115	0.331
0.322	1.35
0.0528	0.566
0.523	0.106
0.398	0.504
0.12	7.69
0.0816	0.13
0.154	0.139
0.437	0.269
0.677	0.149
0.408	0.389
0.427	0.13
0.274	3.52
0.326	0.346
0.874	0.797
0.331	0.163
0.384	0.178
0.096	0.0432
1.03	2.46
0.696	0.542
0.0864	0.0864
0.955	0.518
0.13	0.0672
0.173	0.0912
0.0576	0.816
0.773	0.538
0.557	0.331
0.206	0.72
0.192	0.125
0.163	1.1
0.221	2.02
0.293	0.0864
0.106	1.23
0.13	0.0768
0.0768	0.97
0.0528	2.29
0.072	1.75
0.442	6.11
0.917	1.07
0.173	1.47
0.84	0.149
0.0816	1.39
0.355	3.04
0.6	2.8
0.24	1.58
0.11	0.0432
0.523	0.139
0.221	0.0864
0.178	0.0912
0.048	1.8
1.02	0.0528
0.725	1.51
0.466	4.04
0.048	0.0432
0.0432	0.139
0.547	0.13
0.533	0.192
0.509	0.0816
0.907	0.0576
0.0432	0.336
1.81	0.931
0.586	0.926
0.979	0.912
1.22	1.14
0.662	2.37
0.259	2.58
0.245	0.926
0.048	0.254
0.072	2.58
0.797	2.69
0.0816	0.0624
0.667	3.15
0.326	1.3
0.475	5.9
0.269	2.69
0.163	1.21
0.115	0.418
0.048	0.0816
0.158	3.73
0.341	0.106
0.149	0.0528
0.144	1.02
0.11	0.763
0.523	1.81
0.715	0.744
0.072	3.61
0.907	0.0576
0.139	4
0.845	0.226
0.49	0.0432
1.25	0.514
0.73	0.0912
0.0576	0.182
0.302	0.144
1.31	0.139
0.139	0.907
0.144	2.31
0.374	0.941
0.422	0.427
0.341	0.0576
0.197	0.288
0.048	1.71
0.61	2.4
0.389	4.1
0.264	0.298
0.677	0.0672
0.288	0.389
0.451	0.317
0.235	0.0432
0.259	2.8
0.0768	1.09
0.187	0.936
0.298	1.31
1.09	1.18
0.163	1.09
0.269	0.518
0.101	0.979
0.125	3.01
0.749	2.69
0.59	0.144
0.826	0.331
0.605	0.0624
0.466	1.64
0.187	0.0624
0.61	1.6
0.83	0.264
0.542	2.55
0.312	1.99
0.192	0.624
0.437	1.48
0.125	0.677
0.442	3.1
0.254	0.0864
0.85	0.0528
0.35	0.0432
0.0576	0.254
0.283	0.0576
0.259	0.0624
0.154	0.586
0.206	0.859
0.202	0.072
0.139	0.0432
0.0816	0.23
0.125	0.0432
0.35	0.0768
0.778	0.048
1.38	0.235
0.211	0.0672
0.955	0.072
1.02	0.11
0.408	0.154
1.02	0.0672
0.59	0.072
0.662	0.269
0.211	0.523
0.206	0.106
0.648	0.298
0.643	0.307
1.65	0.917
0.235	0.106
0.48	1.14
0.144	0.624
0.13	1.14
0.259	0.576
0.11	0.634
0.432	0.125
0.149	1.36
0.197	1.02
0.442	0.835
0.365	0.264
0.422	3.02
0.605	0.552
0.139	0.494
0.221	0.379
0.816	0.24
0.595	0.571
0.398	0.797
0.096	0.432
0.581	1.83
0.394	1.1
0.432	0.682
0.254	1.51
0.437	1.56
1.18	0.797
0.221	0.461
0.422	3.17
0.341	0.0672
0.106	0.931
0.134	0.706
0.595	4.41
0.178	0.0432
0.24	0.259
0.571	0.403
0.149	0.355
0.13	0.096
0.134	2.2
0.144	0.0624
0.0912	0.173
0.11	0.278
0.264	0.278
0.125	0.134
0.322	0.149
0.413	0.0672
0.494	0.538
0.451	0.619
0.149	1.67
0.389	0.413
0.264	1.27
0.139	0.59
0.451	0.206
0.245	0.432
0.182	1.43
0.0816	2.59
0.293	0.437
0.379	0.312
0.394	1.41
0.254	1.77
0.178	0.0432
0.182	0.0768
0.11	2.85
0.274	0.523
0.283	2.04
0.101	1.92
0.048	2.25
0.0432	1.2
0.134	0.0432
0.178	0.811
0.854	0.115
0.0672	1.2
0.614	0.0576
0.691	0.72
0.672	0.274
0.638	1.85
0.61	0.763
0.398	2.42
0.691	0.379
0.725	1.59
0.317	0.758
0.144	0.346
0.0576	1.37
0.0528	0.989
1.56	0.072
0.638	1.69
0.288	0.221
0.12	0.322
0.922	2.02
0.125	0.672
0.0864	2.44
0.293	0.59
0.264	0.23
0.192	0.0672
0.125	0.557
0.048	0.182
0.37	0.787
	0.11
	0.859
	0.235
	1.7
	0.475
	0.365
	0.24
	0.864
	0.461
	0.96
	0.902
	1.53
	0.216
	0.586
	0.806
	0.782
	0.946
	1.03
	2.04
	0.326
	0.859
	1.97
	1.87
	0.0768
	0.499
	0.182
	1.23
	2.81
	2.45
	1.31
	0.0432
	0.595
	2.78
	0.293
	0.221
	0.475
	0.293
	1.92
	0.821
	0.677
	0.322
	1.13
	1.97
	0.182
	0.0624
	1.41
	0.902
	1.27
	0.638
	0.0528
	0.538
	1.71
	1.08
	0.0816
	1.81
	0.442
	0.432
	1.7
	0.283
	0.163
	0.307
	1.08
	0.869
	0.13
	0.811
	2.25
	3.93
	0.802
	0.624
	2.38
	0.216
	0.0432
	0.0768
	1.95
	0.197
	2.77
	0.35

## Sheet: RAB-5 mem-cyto
wt	usp-50(xd413)
1.07	1.56
1.29	1.49
0.74	1.76
1.32	1.14
1.24	1.39
0.78	1.35
1.01	1.91
0.98	2.53
0.74	1.68
0.83	1.88
