# Supplementary material for: Spatiotemporal recruitment of the ubiquitin-specific protease USP8 directs endosome maturation
Source: eLife journal article supplement (doi:10.7554/elife.96353), 2024-04-16

Figure 6P

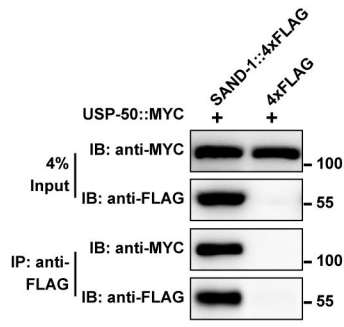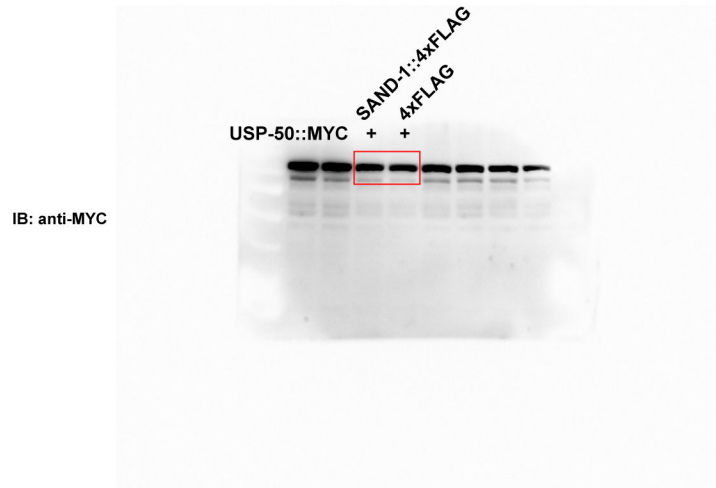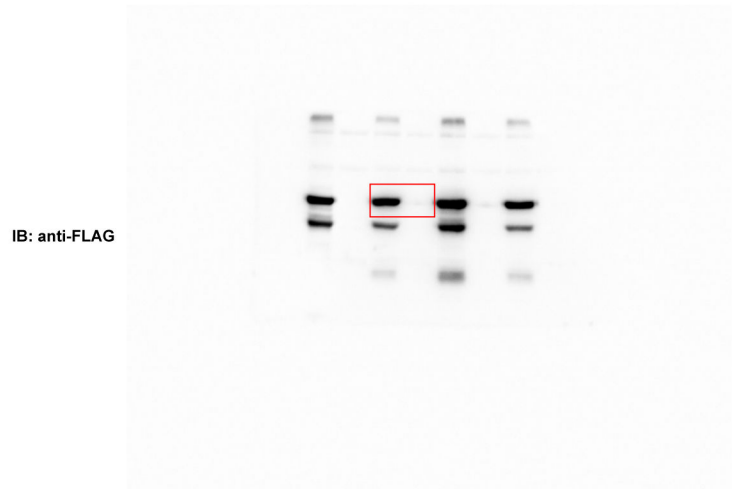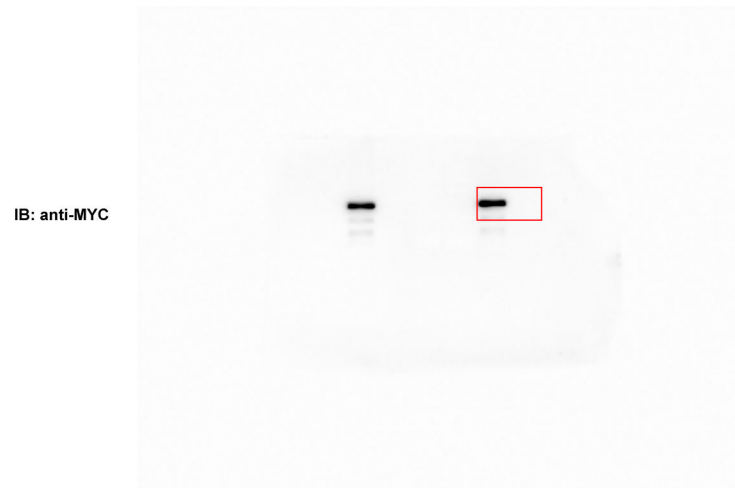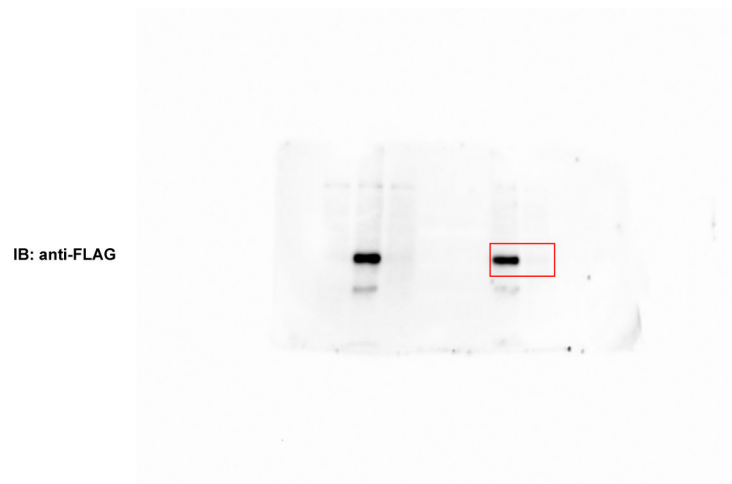

Supplement: fig6-data2 [file elife-96353-fig6-data2-v1.pdf]
