# Supplementary material for: Spatiotemporal recruitment of the ubiquitin-specific protease USP8 directs endosome maturation
Source: eLife journal article supplement (doi:10.7554/elife.96353), 2024-04-16
Supplement: fig6-data3 [file elife-96353-fig6-data3-v1.zip]

## Sheet: Sheet1
wt	usp-50(xd413)	usp-50(xd413); hyp RAB-7
0.0432	0.0432	1.25
0.0432	0.0432	2.64
0.0432	0.0432	2.97
0.048	0.0432	0.504
0.048	0.048	2.08
0.048	0.048	0.254
0.048	0.048	2.97
0.048	0.0528	1.59
0.0528	0.0528	2.35
0.0528	0.0528	2.61
0.0528	0.0528	3.55
0.0576	0.0576	1.99
0.0576	0.0576	1.72
0.0576	0.0576	0.893
0.0576	0.0576	0.475
0.0576	0.0576	0.139
0.0576	0.0576	2.66
0.0624	0.0576	1.39
0.0624	0.0624	3.3
0.0624	0.0624	5.96
0.0624	0.0624	5.02
0.0672	0.072	0.384
0.0672	0.072	0.667
0.0672	0.0816	0.73
0.0672	0.096	0.691
0.072	0.096	0.072
0.072	0.101	0.394
0.072	0.11	0.101
0.072	0.115	1.6
0.0768	0.115	0.686
0.0768	0.115	0.096
0.0768	0.115	0.758
0.0768	0.125	1.06
0.0816	0.125	0.389
0.0816	0.139	1.05
0.0816	0.158	1.29
0.0816	0.178	6.36
0.0816	0.178	0.802
0.0864	0.182	0.12
0.0864	0.192	1.94
0.0912	0.202	2.08
0.0912	0.216	2
0.0912	0.221	3.82
0.0912	0.264	5.01
0.0912	0.322	0.854
0.096	0.331	2.62
0.096	0.365	1.32
0.101	0.461	0.187
0.101	0.461	6.12
0.106	0.523	11.45
0.106	0.523	2.66
0.106	0.533	0.317
0.106	0.533	2.37
0.106	0.581	1.51
0.106	0.619	0.11
0.11	0.634	5.86
0.11	0.643	2.54
0.11	0.754	3.46
0.115	0.763	3.1
0.12	0.768	1.14
0.12	0.773	0.0432
0.12	0.792	0.874
0.12	0.792	1.41
0.12	0.802	0.283
0.12	0.811	0.0672
0.125	0.83	0.0432
0.125	0.83	0.134
0.13	0.869	0.0672
0.13	0.883	3.8
0.13	0.926	10.73
0.13	0.95	0.562
0.13	0.97	0.336
0.134	0.974	2.1
0.134	0.998	1.58
0.134	1	3.53
0.134	1.01	1.94
0.134	1.01	6.09
0.139	1.04	3.73
0.139	1.19	0.115
0.139	1.21	2.79
0.144	1.21	3.51
0.144	1.27	2.24
0.149	1.28	1.86
0.149	1.29	0.326
0.149	1.34	3.28
0.154	1.36	0.288
0.154	1.37	0.0912
0.154	1.49	0.134
0.154	1.49	0.715
0.154	1.53	1.6
0.158	1.58	0.0528
0.158	1.6	0.0432
0.163	1.61	0.389
0.168	1.66	14.26
0.168	1.82	1.56
0.173	1.93	0.0816
0.173	2.06	0.898
0.173	2.1	0.888
0.178	2.16	3.63
0.178	2.22	0.494
0.178	2.25	0.0432
0.178	2.25	4.08
0.182	2.31	0.494
0.182	2.32	0.288
0.187	2.37	1.32
0.192	2.43	3.45
0.192	2.48	0.706
0.192	2.52	2.12
0.192	2.64	0.226
0.197	2.8	0.662
0.197	2.85	0.466
0.197	2.86	0.73
0.197	2.93	0.254
0.197	3.03	5.56
0.197	3.08	6.25
0.202	3.11	1.48
0.202	3.28	0.12
0.202	3.36	1.01
0.202	3.36	0.994
0.206	3.4	4.23
0.206	3.42	1.15
0.211	3.44	0.0528
0.211	3.55	4.05
0.211	3.6	0.59
0.216	3.61	0.12
0.216	3.69	0.0624
0.216	3.71	0.754
0.221	3.87	2.21
0.221	4.05	0.821
0.221	4.15	0.072
0.221	4.19	0.346
0.226	4.29	0.12
0.226	4.32	0.259
0.226	4.38	0.182
0.226	4.44	0.413
0.23	4.46	0.23
0.23	4.54	0.0672
0.23	4.55	8.24
0.235	4.59	7.66
0.235	4.61	0.451
0.235	4.63	6.14
0.235	4.63	4.12
0.24	4.81	1.78
0.24	4.92	2.48
0.245	5.25	2.79
0.245	5.35	3.19
0.25	5.35	0.48
0.254	5.43	2.17
0.254	5.56	3.72
0.254	5.6	2.28
0.254	5.62	3.65
0.259	6.22	0.365
0.259	6.39	0.47
0.259	6.61	3.42
0.264	6.67	0.936
0.269	6.84	3.46
0.269	6.95	0.634
0.269	7.07	1.35
0.269	8.49	1.12
0.269	8.6	1.32
0.274	8.63	4.53
0.274	8.79	0.514
0.274	8.83	3.82
0.278	9.33	5.23
0.278	10.23	2.17
0.278	11.59	0.456
0.278	11.78	4.25
0.278	12.27	3.65
0.283	15.54	0.893
0.283	16.61	0.365
0.288	19.33	0.47
0.288	20.66	0.115
0.293	23.39	0.11
0.293		0.398
0.293		5
0.298		1.19
0.298		0.312
0.298		1.74
0.298		0.326
0.302		0.778
0.302		6.34
0.307		2.87
0.307		0.25
0.312		2.35
0.312		4.46
0.312		4.59
0.312		0.139
0.312		1.8
0.317		1.3
0.322		4.68
0.322		2.45
0.326		3.45
0.326		0.0432
0.326		2.21
0.326		0.576
0.331		4.32
0.341		0.538
0.35		0.658
0.35		1.13
0.35		0.0672
0.35		0.221
0.355		3.06
0.355		0.581
0.355		1.18
0.36		7.55
0.36		0.24
0.36
0.365
0.365
0.365
0.37
0.37
0.37
0.374
0.379
0.379
0.384
0.384
0.384
0.389
0.394
0.394
0.398
0.398
0.403
0.408
0.408
0.408
0.408
0.408
0.413
0.413
0.413
0.413
0.413
0.418
0.418
0.418
0.418
0.418
0.427
0.432
0.432
0.437
0.446
0.451
0.461
0.461
0.466
0.466
0.47
0.47
0.47
0.475
0.475
0.49
0.49
0.494
0.494
0.499
0.499
0.504
0.509
0.514
0.514
0.523
0.528
0.533
0.538
0.538
0.538
0.542
0.562
0.562
0.566
0.571
0.571
0.586
0.595
0.595
0.595
0.6
0.605
0.605
0.61
0.619
0.638
0.643
0.653
0.662
0.672
0.677
0.686
0.686
0.691
0.696
0.696
0.701
0.706
0.715
0.744
0.754
0.768
0.773
0.773
0.773
0.778
0.782
0.782
0.787
0.787
0.797
0.797
0.797
0.816
0.816
0.826
0.826
0.83
0.84
0.845
0.859
0.864
0.869
0.878
0.883
0.883
0.898
0.898
0.907
0.907
0.907
0.926
0.941
0.946
0.96
0.96
0.974
0.984
1.01
1.01
1.03
1.04
1.04
1.05
1.06
1.07
1.07
1.07
1.08
1.08
1.09
1.1
1.11
1.12
1.12
1.14
1.17
1.17
1.18
1.2
1.2
1.21
1.21
1.21
1.23
1.24
1.24
1.24
1.27
1.3
1.3
1.32
1.33
1.34
1.35
1.36
1.37
1.38
1.4
1.4
1.4
1.4
1.43
1.44
1.44
1.44
1.45
1.48
1.53
1.56
1.58
1.59
1.6
1.62
1.63
1.64
1.68
1.69
1.71
1.74
1.74
1.74
1.74
1.8
1.82
1.85
1.86
1.91
1.92
1.93
2.01
2.02
2.05
2.08
2.11
2.12
2.16
2.19
2.21
2.22
2.29
2.32
2.35
2.37
2.41
2.41
2.54
2.59
2.64
2.69
2.72
2.79
2.83
2.86
2.88
2.91
2.98
3.1
3.32
3.58
4.5
5.54
6.25
