# Supplementary material for: Spatiotemporal recruitment of the ubiquitin-specific protease USP8 directs endosome maturation
Source: eLife journal article supplement (doi:10.7554/elife.96353), 2024-04-16
Supplement: fig6-data3 [file fig. 6D, T.xlsx]

## Sheet: fig. 6D
GFP::SAND-1 wt			GFP::SAND-1 rabx-5(null)			GFP::SAND-1 usp-50(xd413)
Distance (μm)	Fluorescence intensity		Distance (μm)	Fluorescence intensity		Distance (μm)	Fluorescence intensity
0	1.8158		0	9.9101		0	10.8193
0.17372	3.5395		0.17372	12.1294		0.17372	9.2613
0.34744	4.0463		0.34744	13.042		0.34744	8.4957
0.52115	5.4035		0.52115	14.5257		0.52115	9.3034
0.69487	7.4484		0.69487	14.0118		0.69487	10.2453
0.86859	5.5365		0.86859	10.358		0.86859	7.8542
1.04231	6.1757		1.04231	12.7148		1.04231	10.9464
1.21603	14.4833		1.21603	14.4946		1.21603	14.6209
1.38974	28.1068		1.38974	14.7831		1.38974	13.3826
1.56346	27.4857		1.56346	16.6554		1.56346	13.741
1.73718	13.0736		1.73718	14.0084		1.73718	11.8329
1.9109	13.6716		1.9109	12.6177		1.9109	11.0136
2.08462	14.5256		2.08462	15.6239		2.08462	11.3525
2.25833	11.2526		2.25833	16.3512		2.25833	11.5822
2.43205	11.4815		2.43205	12.3169		2.43205	12.8687
2.60577	8.0983		2.60577	11.4283		2.60577	12.7763
2.77949	5.0699		2.77949	12.5389		2.77949	10.1213
2.95321	5.0467		2.95321	12.9996		2.95321	8.8365
3.12692	4.2847		3.12692	12.5013		3.12692	8.9063
3.30064	2.7922		3.30064	13.9986		3.30064	8.5698
3.47436	3.8032		3.47436	16.6504		3.47436	10.7938
3.64808	7.479		3.64808	15.6672		3.64808	10.411
3.82179	6.164		3.82179	14.3308		3.82179	11.4394
3.99551	2.2743		3.99551	15.3544		3.99551	14.8192
4.16923	2.2396		4.16923	15.2303		4.16923	12.7882
4.34295	2.9093		4.34295	12.4913		4.34295	11.3497
4.51667	4.5741		4.51667	8.61		4.51667	11.5573
4.69038	5.6763		4.69038	8.5993		4.69038	11.5195
4.8641	4.0383		4.8641	12.9281		4.8641	13.7109
5.03782	2.118		5.03782	13.7043		5.03782	14.7875
5.21154	3.3776		5.21154	9.6487		5.21154	12.8414
5.38526	3.4004		5.38526	8.3238		5.38526	11.3711
5.55897	2.1766		5.55897	7.7582		5.55897	10.3345
5.73269	2.4892		5.73269	8.891		5.73269	8.5323
5.90641	3.0566		5.90641	12.3053		5.90641	9.8712
6.08013	1.8038		6.08013	13.0599		6.08013	10.099
6.25385	1.9828		6.25385	11.2506		6.25385	11.1148
6.42756	3.7046		6.42756	10.1615		6.42756	11.8307
6.60128	4.8903		6.60128	10.1276		6.60128	11.8461
6.775	3.5309		6.775	10.2414		6.775	11.0194
6.94872	4.8796		6.94872	9.5028		6.94872	12.3161
7.12244	9.6144		7.12244	8.4966		7.12244	10.6218
7.29615	13.7749		7.29615	7.4456		7.29615	10.0754
7.46987	16.7569		7.46987	8.0118		7.46987	11.961
7.64359	13.6642		7.64359	10.038		7.64359	11.6925
7.81731	25.0713		7.81731	14.3568		7.81731	10.1754
7.99103	21.6553		7.99103	13.8074		7.99103	13.5058
8.16474	9.0306		8.16474	11.4698		8.16474	17.0375
8.33846	4.3014		8.33846	11.2681		8.33846	19.3584
8.51218	4.2429		8.51218	9.409		8.51218	17.8738
8.6859	5.9081		8.6859	9.9837		8.6859	14.6751
8.85962	4.5209		8.85962	8.5177		8.85962	12.5557
9.03333	4.2051		9.03333	6.1957		9.03333	14.2986
9.20705	3.078		9.20705	8.1283		9.20705	14.9437
9.38077	5.395		9.38077	13.2332		9.38077	14.971
9.55449	6.3191		9.55449	14.6992		9.55449	13.5617
9.7282	5.3647		9.7282	14.944		9.7282	13.3754
9.90192	5.8272		9.90192	12.7268		9.90192	12.5378
10.0756	7.2163		10.0756	12.1443		10.0756	15.3199

## Sheet: fig. 6T
GFP::RAB-7 KI wt			GFP::RAB-7 KI sand-1(or552)			GFP::RAB-7 KI usp-50(xd413)
Distance_(μm)	Fluorescence_intensity		Distance (μm)	Fluorescence intensity		Distance (μm)	Fluorescence intensity
0	2.0321		0	15.7754		0	17.0412
0.1841	0.7891		0.1841	17.0223		0.1841	15.9837
0.3682	2.4125		0.3682	20.8046		0.3682	14.7743
0.5522	2.3236		0.5522	24.4863		0.5522	11.9737
0.7363	0.9447		0.7363	17.711		0.7363	8.2122
0.9204	1.5949		0.9204	11.722		0.9204	11.9447
1.1045	1.8505		1.1045	16.4418		1.1045	9.9853
1.2886	6.5091		1.2886	18.8567		1.2886	9.1411
1.4727	21.9495		1.4727	16.8839		1.4727	8.2731
1.6567	56.7477		1.6567	16.8081		1.6567	4.927
1.8408	84.6969		1.8408	17.1207		1.8408	12.7149
2.0249	85		2.0249	20.2413		2.0249	14.3098
2.209	85		2.209	19.8149		2.209	11.9031
2.3931	85		2.3931	22.0611		2.3931	18.0737
2.5772	83.052		2.5772	21.8498		2.5772	24.2901
2.7612	51.9286		2.7612	16.512		2.7612	24.7458
2.9453	11.058		2.9453	18.8639		2.9453	15.5787
3.1294	8.0567		3.1294	16.5885		3.1294	20.1143
3.3135	14.2138		3.3135	19.5816		3.3135	40.6649
3.4976	35.2992		3.4976	20.5456		3.4976	45.7233
3.6816	63.6331		3.6816	16.9778		3.6816	35.1286
3.8657	83.7412		3.8657	17.2829		3.8657	36.7278
4.0498	82.8571		4.0498	16.3322		4.0498	40.8047
4.2339	62.6313		4.2339	15.2845		4.2339	35.9285
4.418	21.2696		4.418	16.1918		4.418	28.0611
4.6021	2.0272		4.6021	12.9145		4.6021	10.6199
4.7861	0.6371		4.7861	16.4244		4.7861	12.9305
4.9702	1.1146		4.9702	21.4863		4.9702	16.4237
5.1543	1.1133		5.1543	31.5294		5.1543	18.5503
5.3384	0.6667		5.3384	45.1049		5.3384	21.0762
5.5225	0.6315		5.5225	43.3816		5.5225	28.91
5.7066	1.4561		5.7066	25.7701		5.7066	40.3243
5.8906	3.3122		5.8906	21.6343		5.8906	43.6345
6.0747	2.5051		6.0747	21.6733		6.0747	43.4242
6.2588	1.3654		6.2588	20.0115		6.2588	49.8971
6.4429	1.5718		6.4429	21.0047		6.4429	55.6511
6.627	2.0742		6.627	26.263		6.627	47.8934
6.811	2.2848		6.811	29.422		6.811	29.4977
6.9951	1.3806		6.9951	23.067		6.9951	23.4499
7.1792	0.9178		7.1792	24.1696		7.1792	16.4369
7.3633	1.7218		7.3633	25.75		7.3633	12.9924
7.5474	4.5387		7.5474	29.3506		7.5474	21.2156
7.7315	5.586		7.7315	31.544		7.7315	15.959
7.9155	2.1893		7.9155	24.8235		7.9155	16.9239
8.0996	1.382		8.0996	23.236		8.0996	18.7253
8.2837	1.8662		8.2837	21.9067		8.2837	26.6048
8.4678	10.9179		8.4678	31.7442		8.4678	31.3618
8.6519	49.6296		8.6519	40.068		8.6519	24.1112
8.836	83.9737		8.836	39.2175		8.836	22.2165
9.02	84.1864		9.02	32.1427		9.02	16.9082
9.2041	73.7941		9.2041	45.2278		9.2041	18.6852
9.3882	24.5353		9.3882	44.5377		9.3882	22.7707
9.5723	0.5382		9.5723	50.2777		9.5723	28.7193
9.7564	2.3068		9.7564	49.1437		9.7564	34.5789
9.9404	3.1619		9.9404	49.8587		9.9404	32.8832
10.1245	3.0058		10.1245	30.5822		10.1245	37.9426
