# Supplementary material for: Spatiotemporal recruitment of the ubiquitin-specific protease USP8 directs endosome maturation
Source: eLife journal article supplement (doi:10.7554/elife.96353), 2024-04-16
Supplement: fig6-figsupp1-data3 [file elife-96353-fig6-figsupp1-data3-v1.zip]

## Sheet: volume of LAAT-1
wt	rabx-5(null)	usp-50(xd413)
0.0432	0.0048	0.0048
0.0432	0.0048	0.0048
0.0432	0.0048	0.0048
0.0432	0.0048	0.0048
0.0432	0.0048	0.0048
0.0432	0.0048	0.0048
0.0432	0.0048	0.0048
0.048	0.0048	0.0048
0.048	0.0048	0.0048
0.048	0.0048	0.0048
0.048	0.0048	0.0048
0.048	0.0048	0.0048
0.048	0.0048	0.0048
0.048	0.0048	0.0048
0.048	0.0048	0.0048
0.048	0.0048	0.0048
0.048	0.0048	0.0048
0.0528	0.0048	0.0048
0.0528	0.0048	0.0048
0.0528	0.0048	0.0048
0.0528	0.0048	0.0048
0.0528	0.0048	0.0048
0.0528	0.0048	0.0048
0.0528	0.0048	0.0048
0.0528	0.0048	0.0048
0.0528	0.0048	0.0048
0.0528	0.0048	0.0048
0.0576	0.0048	0.0048
0.0576	0.0048	0.0048
0.0576	0.0048	0.0048
0.0576	0.0048	0.0048
0.0576	0.0048	0.0048
0.0576	0.0048	0.0048
0.0576	0.0048	0.0048
0.0576	0.0048	0.0048
0.0576	0.0048	0.0048
0.0576	0.0048	0.0048
0.0624	0.0048	0.0048
0.0624	0.0048	0.0048
0.0624	0.0048	0.0048
0.0624	0.0048	0.0048
0.0624	0.0048	0.0048
0.0624	0.0048	0.0048
0.0624	0.0048	0.0048
0.0624	0.0048	0.0048
0.0624	0.0048	0.0048
0.0672	0.0048	0.0048
0.0672	0.0048	0.0048
0.0672	0.0048	0.0048
0.0672	0.0048	0.0048
0.0672	0.0048	0.0048
0.0672	0.0048	0.0096
0.0672	0.0048	0.0096
0.0672	0.0048	0.0096
0.0672	0.0048	0.0096
0.072	0.0048	0.0096
0.072	0.0048	0.0096
0.072	0.0048	0.0096
0.072	0.0048	0.0096
0.072	0.0048	0.0096
0.072	0.0048	0.0096
0.0768	0.0048	0.0096
0.0768	0.0048	0.0096
0.0768	0.0048	0.0096
0.0768	0.0048	0.0096
0.0768	0.0048	0.0096
0.0768	0.0048	0.0096
0.0768	0.0048	0.0096
0.0768	0.0048	0.0144
0.0768	0.0048	0.0144
0.0768	0.0048	0.0144
0.0816	0.0048	0.0144
0.0816	0.0048	0.0144
0.0816	0.0048	0.0144
0.0816	0.0048	0.0144
0.0816	0.0048	0.0144
0.0816	0.0048	0.0144
0.0816	0.0048	0.0192
0.0816	0.0048	0.0192
0.0816	0.0048	0.0192
0.0816	0.0048	0.0192
0.0816	0.0048	0.0192
0.0864	0.0048	0.0192
0.0864	0.0048	0.0192
0.0864	0.0048	0.0192
0.0864	0.0048	0.0192
0.0864	0.0048	0.024
0.0864	0.0048	0.024
0.0864	0.0048	0.024
0.0912	0.0048	0.0288
0.0912	0.0048	0.0288
0.0912	0.0048	0.0288
0.0912	0.0048	0.0288
0.0912	0.0048	0.0288
0.0912	0.0048	0.0288
0.0912	0.0048	0.0336
0.0912	0.0048	0.0336
0.0912	0.0048	0.0336
0.0912	0.0048	0.0336
0.096	0.0048	0.0336
0.096	0.0048	0.0384
0.096	0.0048	0.0384
0.096	0.0048	0.0384
0.096	0.0048	0.0384
0.096	0.0048	0.0384
0.096	0.0048	0.0384
0.096	0.0048	0.0384
0.096	0.0048	0.0432
0.101	0.0048	0.0432
0.101	0.0048	0.0432
0.101	0.0048	0.0432
0.101	0.0048	0.0432
0.101	0.0048	0.0432
0.101	0.0048	0.0432
0.101	0.0048	0.0432
0.106	0.0048	0.0432
0.106	0.0048	0.0432
0.106	0.0048	0.0432
0.106	0.0048	0.0432
0.106	0.0048	0.0432
0.106	0.0048	0.0432
0.106	0.0048	0.0432
0.106	0.0048	0.0432
0.106	0.0048	0.0432
0.106	0.0048	0.0432
0.106	0.0048	0.0432
0.11	0.0048	0.0432
0.11	0.0048	0.0432
0.11	0.0048	0.0432
0.11	0.0048	0.0432
0.11	0.0048	0.0432
0.11	0.0048	0.0432
0.11	0.0048	0.0432
0.115	0.0048	0.048
0.115	0.0048	0.048
0.115	0.0048	0.048
0.115	0.0048	0.048
0.115	0.0048	0.048
0.115	0.0048	0.048
0.115	0.0048	0.048
0.115	0.0048	0.048
0.12	0.0048	0.048
0.12	0.0048	0.048
0.12	0.0048	0.048
0.12	0.0048	0.048
0.12	0.0048	0.048
0.125	0.0048	0.048
0.125	0.0048	0.048
0.125	0.0048	0.048
0.125	0.0048	0.048
0.125	0.0048	0.048
0.13	0.0048	0.048
0.13	0.0048	0.048
0.13	0.0048	0.048
0.13	0.0048	0.048
0.13	0.0048	0.048
0.134	0.0048	0.048
0.134	0.0048	0.048
0.134	0.0048	0.048
0.134	0.0048	0.048
0.134	0.0048	0.048
0.134	0.0048	0.0528
0.134	0.0048	0.0528
0.134	0.0048	0.0528
0.139	0.0048	0.0528
0.139	0.0048	0.0528
0.139	0.0048	0.0528
0.144	0.0048	0.0528
0.144	0.0048	0.0528
0.144	0.0048	0.0528
0.144	0.0048	0.0528
0.149	0.0048	0.0528
0.149	0.0048	0.0528
0.149	0.0048	0.0528
0.149	0.0048	0.0528
0.149	0.0048	0.0528
0.154	0.0048	0.0528
0.154	0.0048	0.0576
0.154	0.0048	0.0576
0.154	0.0048	0.0576
0.158	0.0048	0.0576
0.158	0.0048	0.0576
0.158	0.0048	0.0576
0.158	0.0048	0.0576
0.163	0.0048	0.0576
0.163	0.0048	0.0576
0.163	0.0048	0.0576
0.163	0.0048	0.0576
0.163	0.0048	0.0576
0.168	0.0048	0.0624
0.168	0.0048	0.0624
0.168	0.0048	0.0624
0.173	0.0048	0.0624
0.173	0.0048	0.0624
0.178	0.0048	0.0624
0.178	0.0048	0.0624
0.178	0.0048	0.0624
0.178	0.0048	0.0624
0.178	0.0048	0.0624
0.178	0.0048	0.0624
0.178	0.0048	0.0624
0.182	0.0048	0.0624
0.182	0.0048	0.0624
0.182	0.0048	0.0624
0.182	0.0048	0.0624
0.182	0.0048	0.0624
0.182	0.0048	0.0624
0.187	0.0048	0.0624
0.187	0.0048	0.0624
0.187	0.0048	0.0624
0.187	0.0048	0.0624
0.192	0.0048	0.0624
0.192	0.0048	0.0672
0.192	0.0048	0.0672
0.192	0.0048	0.0672
0.197	0.0048	0.0672
0.197	0.0048	0.0672
0.197	0.0048	0.0672
0.197	0.0048	0.0672
0.202	0.0048	0.0672
0.202	0.0048	0.0672
0.202	0.0048	0.0672
0.202	0.0048	0.0672
0.206	0.0048	0.0672
0.206	0.0048	0.0672
0.206	0.0048	0.0672
0.206	0.0048	0.0672
0.211	0.0048	0.0672
0.211	0.0048	0.0672
0.211	0.0048	0.0672
0.211	0.0048	0.0672
0.211	0.0048	0.0672
0.216	0.0048	0.0672
0.216	0.0048	0.0672
0.221	0.0048	0.0672
0.221	0.0048	0.072
0.221	0.0048	0.072
0.221	0.0048	0.072
0.226	0.0048	0.072
0.226	0.0048	0.072
0.23	0.0048	0.072
0.23	0.0048	0.072
0.23	0.0048	0.072
0.235	0.0048	0.072
0.235	0.0048	0.072
0.235	0.0048	0.072
0.235	0.0048	0.0768
0.235	0.0048	0.0768
0.235	0.0048	0.0768
0.235	0.0048	0.0768
0.24	0.0048	0.0768
0.24	0.0048	0.0768
0.24	0.0048	0.0768
0.24	0.0048	0.0768
0.24	0.0048	0.0768
0.245	0.0048	0.0768
0.245	0.0048	0.0768
0.245	0.0048	0.0768
0.245	0.0048	0.0816
0.245	0.0048	0.0816
0.25	0.0048	0.0816
0.25	0.0048	0.0816
0.254	0.0048	0.0816
0.254	0.0048	0.0816
0.254	0.0048	0.0816
0.259	0.0048	0.0816
0.259	0.0048	0.0816
0.264	0.0048	0.0864
0.264	0.0048	0.0864
0.264	0.0048	0.0864
0.269	0.0048	0.0864
0.269	0.0048	0.0864
0.269	0.0048	0.0864
0.274	0.0048	0.0864
0.274	0.0048	0.0864
0.274	0.0048	0.0864
0.278	0.0048	0.0864
0.278	0.0048	0.0912
0.278	0.0048	0.0912
0.278	0.0048	0.0912
0.278	0.0048	0.0912
0.278	0.0048	0.0912
0.278	0.0048	0.0912
0.283	0.0048	0.0912
0.283	0.0048	0.0912
0.283	0.0048	0.0912
0.283	0.0048	0.0912
0.283	0.0048	0.0912
0.288	0.0096	0.096
0.288	0.0096	0.096
0.288	0.0096	0.096
0.288	0.0096	0.096
0.288	0.0096	0.096
0.293	0.0096	0.096
0.293	0.0096	0.096
0.293	0.0096	0.096
0.293	0.0096	0.096
0.293	0.0096	0.096
0.293	0.0096	0.096
0.293	0.0096	0.096
0.293	0.0096	0.096
0.298	0.0096	0.096
0.298	0.0096	0.096
0.298	0.0096	0.096
0.302	0.0096	0.096
0.302	0.0096	0.096
0.307	0.0096	0.101
0.307	0.0096	0.101
0.312	0.0096	0.101
0.312	0.0096	0.101
0.312	0.0096	0.101
0.312	0.0096	0.101
0.312	0.0096	0.101
0.317	0.0096	0.106
0.317	0.0096	0.106
0.322	0.0096	0.106
0.322	0.0096	0.106
0.322	0.0096	0.106
0.331	0.0096	0.106
0.331	0.0096	0.106
0.331	0.0096	0.106
0.336	0.0096	0.106
0.336	0.0096	0.106
0.336	0.0096	0.11
0.336	0.0096	0.11
0.336	0.0096	0.11
0.346	0.0096	0.11
0.346	0.0096	0.11
0.346	0.0096	0.11
0.35	0.0096	0.11
0.355	0.0096	0.11
0.355	0.0144	0.115
0.355	0.0144	0.115
0.36	0.0144	0.115
0.36	0.0144	0.115
0.36	0.0144	0.115
0.36	0.0144	0.115
0.36	0.0144	0.115
0.365	0.0144	0.115
0.365	0.0144	0.115
0.365	0.0144	0.115
0.365	0.0144	0.115
0.365	0.0144	0.12
0.37	0.0144	0.12
0.37	0.0144	0.12
0.37	0.0144	0.12
0.374	0.0144	0.125
0.374	0.0144	0.125
0.374	0.0144	0.125
0.374	0.0144	0.125
0.379	0.0144	0.125
0.379	0.0144	0.125
0.379	0.0144	0.13
0.379	0.0144	0.13
0.384	0.0192	0.13
0.384	0.0192	0.13
0.384	0.0192	0.13
0.384	0.0192	0.134
0.389	0.0192	0.134
0.389	0.0192	0.134
0.389	0.0192	0.134
0.389	0.0192	0.134
0.389	0.0192	0.139
0.398	0.0192	0.139
0.398	0.0192	0.139
0.408	0.0192	0.139
0.408	0.0192	0.139
0.408	0.024	0.139
0.408	0.024	0.139
0.413	0.024	0.144
0.413	0.024	0.144
0.413	0.024	0.144
0.413	0.024	0.144
0.418	0.024	0.144
0.422	0.024	0.144
0.427	0.024	0.144
0.427	0.024	0.144
0.427	0.024	0.144
0.432	0.024	0.144
0.432	0.024	0.144
0.432	0.024	0.149
0.432	0.024	0.154
0.442	0.024	0.154
0.442	0.0288	0.154
0.446	0.0288	0.158
0.451	0.0288	0.158
0.451	0.0288	0.158
0.456	0.0288	0.158
0.461	0.0288	0.158
0.461	0.0288	0.163
0.461	0.0288	0.163
0.466	0.0288	0.163
0.475	0.0288	0.168
0.475	0.0336	0.168
0.475	0.0336	0.168
0.475	0.0336	0.168
0.48	0.0336	0.168
0.48	0.0336	0.173
0.485	0.0336	0.173
0.485	0.0336	0.173
0.485	0.0336	0.178
0.485	0.0336	0.178
0.49	0.0336	0.182
0.49	0.0336	0.182
0.49	0.0336	0.182
0.49	0.0336	0.182
0.49	0.0336	0.187
0.49	0.0384	0.187
0.494	0.0384	0.187
0.494	0.0384	0.187
0.504	0.0384	0.187
0.504	0.0384	0.187
0.509	0.0384	0.192
0.514	0.0384	0.192
0.518	0.0384	0.197
0.518	0.0384	0.197
0.523	0.0384	0.197
0.533	0.0384	0.202
0.533	0.0432	0.202
0.538	0.0432	0.202
0.538	0.0432	0.202
0.542	0.0432	0.211
0.542	0.0432	0.211
0.542	0.0432	0.211
0.547	0.0432	0.211
0.552	0.0432	0.211
0.552	0.0432	0.216
0.562	0.048	0.216
0.562	0.048	0.216
0.571	0.048	0.216
0.571	0.048	0.216
0.571	0.048	0.216
0.581	0.048	0.221
0.586	0.0528	0.221
0.586	0.0528	0.221
0.59	0.0528	0.221
0.59	0.0528	0.226
0.59	0.0528	0.226
0.595	0.0528	0.226
0.6	0.0528	0.226
0.605	0.0528	0.23
0.614	0.0528	0.24
0.619	0.0576	0.24
0.619	0.0576	0.245
0.624	0.0576	0.25
0.629	0.0576	0.259
0.629	0.0576	0.264
0.634	0.0576	0.269
0.638	0.0576	0.269
0.638	0.0624	0.274
0.643	0.0624	0.283
0.653	0.0624	0.283
0.653	0.0624	0.288
0.653	0.0624	0.288
0.658	0.0624	0.293
0.662	0.0672	0.293
0.662	0.0672	0.293
0.672	0.0672	0.293
0.677	0.0672	0.298
0.677	0.0672	0.298
0.677	0.0672	0.298
0.682	0.072	0.298
0.682	0.072	0.302
0.691	0.072	0.302
0.691	0.072	0.302
0.696	0.072	0.312
0.701	0.072	0.312
0.701	0.072	0.312
0.701	0.072	0.317
0.71	0.072	0.326
0.715	0.072	0.326
0.72	0.0768	0.326
0.72	0.0768	0.331
0.72	0.0768	0.336
0.725	0.0768	0.336
0.734	0.0768	0.336
0.744	0.0816	0.336
0.754	0.0816	0.341
0.758	0.0816	0.341
0.763	0.0816	0.341
0.763	0.0816	0.341
0.782	0.0816	0.346
0.787	0.0816	0.346
0.787	0.0816	0.355
0.797	0.0816	0.365
0.802	0.0816	0.365
0.806	0.0816	0.37
0.811	0.0816	0.374
0.816	0.0816	0.384
0.826	0.0864	0.384
0.83	0.0864	0.384
0.83	0.0864	0.384
0.83	0.0864	0.389
0.835	0.0864	0.389
0.845	0.0864	0.394
0.85	0.0864	0.398
0.859	0.0864	0.398
0.864	0.0912	0.403
0.864	0.0912	0.408
0.864	0.0912	0.408
0.869	0.0912	0.408
0.874	0.0912	0.418
0.878	0.0912	0.422
0.893	0.0912	0.422
0.912	0.0912	0.432
0.912	0.0912	0.437
0.946	0.096	0.437
0.946	0.096	0.442
0.946	0.096	0.446
0.96	0.096	0.446
0.97	0.096	0.446
0.974	0.096	0.451
0.998	0.096	0.466
0.998	0.096	0.47
1	0.096	0.47
1	0.101	0.485
1	0.101	0.494
1.01	0.101	0.494
1.01	0.101	0.504
1.05	0.101	0.514
1.05	0.106	0.518
1.05	0.106	0.518
1.06	0.106	0.528
1.07	0.106	0.538
1.08	0.106	0.552
1.08	0.106	0.562
1.09	0.106	0.566
1.1	0.11	0.595
1.11	0.11	0.61
1.11	0.11	0.619
1.12	0.11	0.624
1.13	0.11	0.624
1.13	0.11	0.648
1.15	0.11	0.658
1.16	0.11	0.662
1.16	0.11	0.662
1.18	0.11	0.686
1.2	0.115	0.739
1.2	0.115	0.773
1.2	0.115	0.773
1.21	0.115	0.792
1.23	0.115	0.816
1.24	0.115	0.816
1.26	0.115	0.864
1.27	0.115	0.874
1.27	0.115	0.874
1.3	0.12	0.874
1.3	0.12	0.902
1.31	0.12	0.912
1.31	0.125	0.912
1.32	0.125	0.917
1.36	0.125	0.941
1.37	0.13	0.95
1.37	0.13	0.97
1.37	0.13	0.974
1.39	0.13	0.984
1.39	0.13	0.998
1.4	0.13	1.08
1.4	0.13	1.08
1.42	0.134	1.1
1.44	0.134	1.13
1.45	0.134	1.15
1.45	0.134	1.15
1.47	0.134	1.16
1.49	0.134	1.25
1.51	0.134	1.27
1.54	0.134	1.3
1.54	0.134	1.3
1.56	0.134	1.32
1.6	0.139	1.33
1.64	0.144	1.39
1.66	0.144	1.42
1.66	0.144	1.46
1.72	0.144	1.51
1.74	0.144	1.64
1.76	0.144	1.67
1.76	0.149	1.68
1.77	0.149	1.75
1.78	0.149	1.95
1.79	0.149	2.08
1.8	0.149	2.09
1.81	0.154	2.23
1.81	0.154	2.25
1.83	0.154	2.64
1.84	0.154	3.06
1.84	0.154	3.42
1.86	0.158	3.54
1.92	0.158	3.85
1.92	0.158
1.93	0.158
1.97	0.163
1.98	0.163
2.03	0.163
2.03	0.168
2.04	0.168
2.04	0.173
2.05	0.173
2.08	0.173
2.09	0.173
2.13	0.178
2.14	0.178
2.23	0.178
2.28	0.178
2.37	0.178
2.42	0.178
2.45	0.182
2.53	0.182
2.54	0.182
2.56	0.187
2.59	0.187
2.66	0.192
2.66	0.192
2.67	0.192
2.71	0.192
2.74	0.192
2.76	0.192
2.8	0.197
2.85	0.197
2.88	0.197
2.88	0.197
2.97	0.197
2.99	0.197
3.01	0.202
3.02	0.202
3.2	0.202
3.24	0.202
3.24	0.206
3.24	0.206
3.29	0.206
3.36	0.206
3.38	0.211
3.55	0.211
3.6	0.211
3.67	0.211
3.75	0.216
3.78	0.221
3.81	0.221
3.81	0.221
3.9	0.221
3.9	0.221
4.01	0.221
4.04	0.221
4.11	0.221
4.11	0.226
4.14	0.226
4.24	0.23
4.26	0.23
4.31	0.235
4.37	0.235
4.41	0.235
4.49	0.235
4.51	0.235
4.79	0.235
4.8	0.24
4.81	0.24
4.86	0.24
4.9	0.245
5.04	0.245
5.07	0.25
5.08	0.25
5.11	0.25
5.48	0.25
5.49	0.254
5.49	0.254
5.52	0.254
5.59	0.254
5.94	0.259
5.95	0.259
6.04	0.259
6.2	0.259
6.23	0.259
6.24	0.264
6.33	0.264
6.36	0.264
6.37	0.264
6.65	0.269
6.76	0.269
6.83	0.274
6.88	0.274
6.92	0.278
7.2	0.278
7.24	0.278
7.29	0.283
7.32	0.283
7.36	0.283
7.63	0.283
7.77	0.288
7.77	0.288
7.84	0.288
7.85	0.288
7.98	0.293
8.09	0.293
8.09	0.293
8.3	0.298
8.35	0.298
8.6	0.298
8.81	0.302
9.04	0.302
9.25	0.302
9.28	0.307
9.67	0.307
9.67	0.312
9.9	0.312
10.08	0.312
10.39	0.312
10.97	0.317
11.05	0.317
11.19	0.317
11.19	0.322
11.65	0.322
12.03	0.326
12.06	0.326
12.28	0.326
12.34	0.331
13.13	0.336
14.97	0.336
15.36	0.341
16.77	0.341
18.84	0.346
19.3	0.346
	0.346
	0.35
	0.35
	0.35
	0.355
	0.355
	0.37
	0.37
	0.37
	0.37
	0.374
	0.374
	0.384
	0.384
	0.384
	0.384
	0.394
	0.394
	0.398
	0.408
	0.408
	0.413
	0.413
	0.418
	0.422
	0.422
	0.422
	0.432
	0.432
	0.432
	0.437
	0.442
	0.442
	0.446
	0.446
	0.446
	0.456
	0.456
	0.461
	0.466
	0.48
	0.48
	0.485
	0.485
	0.49
	0.49
	0.49
	0.499
	0.504
	0.504
	0.504
	0.504
	0.509
	0.509
	0.514
	0.514
	0.514
	0.528
	0.528
	0.538
	0.538
	0.538
	0.547
	0.552
	0.557
	0.562
	0.576
	0.576
	0.586
	0.586
	0.59
	0.595
	0.61
	0.614
	0.624
	0.624
	0.638
	0.638
	0.643
	0.653
	0.658
	0.658
	0.662
	0.672
	0.672
	0.677
	0.677
	0.686
	0.686
	0.686
	0.701
	0.706
	0.706
	0.706
	0.706
	0.71
	0.715
	0.725
	0.73
	0.734
	0.734
	0.739
	0.749
	0.754
	0.763
	0.768
	0.773
	0.778
	0.782
	0.806
	0.811
	0.811
	0.816
	0.83
	0.84
	0.859
	0.859
	0.869
	0.883
	0.893
	0.907
	0.912
	0.926
	0.931
	0.95
	0.95
	0.95
	0.979
	0.984
	0.994
	0.994
	0.998
	0.998
	0.998
	1.01
	1.02
	1.02
	1.03
	1.03
	1.03
	1.04
	1.04
	1.04
	1.05
	1.05
	1.06
	1.08
	1.08
	1.1
	1.1
	1.1
	1.1
	1.11
	1.12
	1.13
	1.14
	1.15
	1.15
	1.17
	1.19
	1.19
	1.21
	1.21
	1.24
	1.25
	1.25
	1.3
	1.3
	1.31
	1.34
	1.35
	1.35
	1.36
	1.4
	1.45
	1.47
	1.47
	1.49
	1.5
	1.51
	1.51
	1.52
	1.57
	1.6
	1.61
	1.64
	1.66
	1.66
	1.68
	1.7
	1.76
	1.78
	1.8
	1.8
	1.82
	1.87
	1.9
	1.97
	2
	2.01
	2.06
	2.09
	2.24
	2.3
	2.3
	2.34
	2.41
	2.41
	2.42
	2.46
	2.61
	2.67
	2.81
	2.84
	2.92
	3.1
	3.11
	3.13
	3.2
	3.36
	3.8
	4.05
	4.05
	4.05
	4.12
	4.14
	4.16
	4.3
	4.51
	4.98
	5.31
	5.37
	5.57
	5.58
	5.99
	6.17
	6.56
	7.05
	7.39
	7.6
	9.88
