# Supplementary material for: Spatiotemporal recruitment of the ubiquitin-specific protease USP8 directs endosome maturation
Source: eLife. 2024 Nov 22;13:RP96353. doi: 10.7554/eLife.96353 (PMC11584181; doi:10.7554/eLife.96353)
Supplement: Figure 3—source data 1. [file elife-96353-fig3-data1.xlsx]

## Sheet: Sheet1
	Track 1						Track 2						Track 3
	time (s)	mScarlet-I-Rab5c	USP8-mEGFP				time (s)	mScarlet-I-Rab5c	USP8-mEGFP				time (s)	mScarlet-I-Rab5c	USP8-mEGFP
	0	9276	2594				0	8672	2072				0	7714	2209
	2	8945	2633				2	7567	2582				2	7404	2211
	4	9922	2108				4	9338	2431				4	7784	2537
	6	9784	2248				6	7467	2318				6	6580	2250
	8	10565	2271				8	8296	2326				8	6370	2074
	10	11721	2119				10	9966	2495				10	6208	2582
	12	9188	2366				12	8268	2078				12	5859	2029
	14	8938	2223				14	9175	2345				14	5657	2257
	16	9229	2768				16	8934	2037				16	6802	2176
	18	8971	2116				18	7919	1727				18	5705	2617
	20	9097	2414				20	7255	2338				20	5241	2331
	22	8018	2388				22	8227	2092				22	6045	2101
	24	7771	2223				24	8228	2034				24	5223	2054
	26	7406	2358				26	7603	2030				26	6160	2225
	28	7120	2045				28	8113	1984				28	7188	2140
	30	7385	2005				30	9490	2117				30	6005	2229
	32	6301	2185				32	8003	2212				32	5587	2289
	34	6896	2179				34	7863	2074				34	5691	2337
	36	8845	2377				36	6815	2239				36	5313	2453
	38	7977	2435				38	6786	2324				38	5834	2461
	40	8541	3745				40	7656	2767				40	5888	3300
	42	6790	4457				42	6523	3999				42	5361	4435
	44	6969	5214				44	6868	5165				44	4990	5000
	46	7035	6153				46	7881	6910				46	5308	5285
	48	5640	6551				48	7325	7376				48	5894	7311
	50	6768	5665				50	7043	7898				50	5487	7928
	52	5505	8277				52	6748	8389				52	6595	7434
	54	5688	6157				54	6146	8084				54	5898	6936
	56	6262	7753				56	6682	8070				56	5223	6317
	58	5746	10652				58	7357	9899				58	4678	7677
	60	5830	7528				60	8128	8398				60	4758	8554
